# Supplementary material for: Deep mutational scanning of S. pyogenes Cas9 reveals important functional domains
Source: PubMed Central journal article supplement (PMC5715146; doi:10.1038/s41598-017-17081-y), 2017-12-04
Supplement: 41598_2017_17081_MOESM1_ESM.pdf [file 41598_2017_17081_MOESM1_ESM.pdf]

# **Deep mutational scanning of *S. pyogenes* Cas9 reveals important functional domains**

Jeffrey M Spencer<sup>1,2</sup> and Xiaoliu Zhang<sup>1,2,\*</sup>

<sup>1</sup> Department of Biology and Biochemistry, University of Houston, Houston, Texas, 77204, USA

<sup>2</sup> Center for Nuclear Receptors and Cell Signaling, University of Houston, Houston, Texas, 77204, USA

\* To whom correspondence should be addressed. Email: [xzhang5@central.uh.edu](mailto:xzhang5@central.uh.edu)

## Supplementary Figure 1

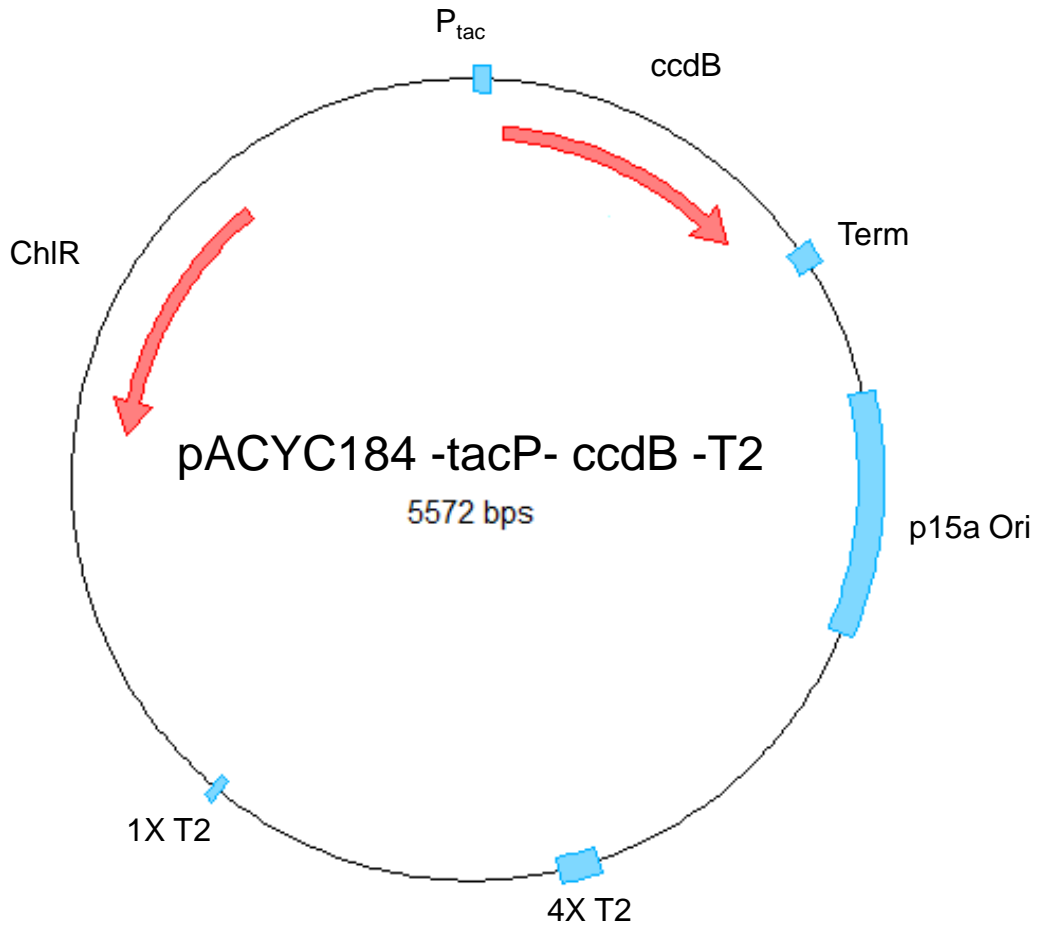

### Supplementary Figure 1: pACYC184-tacP-ccdB-T2 Plasmid Map.

This plasmid was used for positive selection. Multiple gRNA-targeted sites (T2) were inserted at different locations in the plasmid to facilitate degradation of the plasmid following Cas9 cleavage. The P<sub>tac</sub> drives IPTG dependent *ccdB* expression. The p15a promoter maintains the plasmid at moderate copy levels.

## Supplementary Figure 2

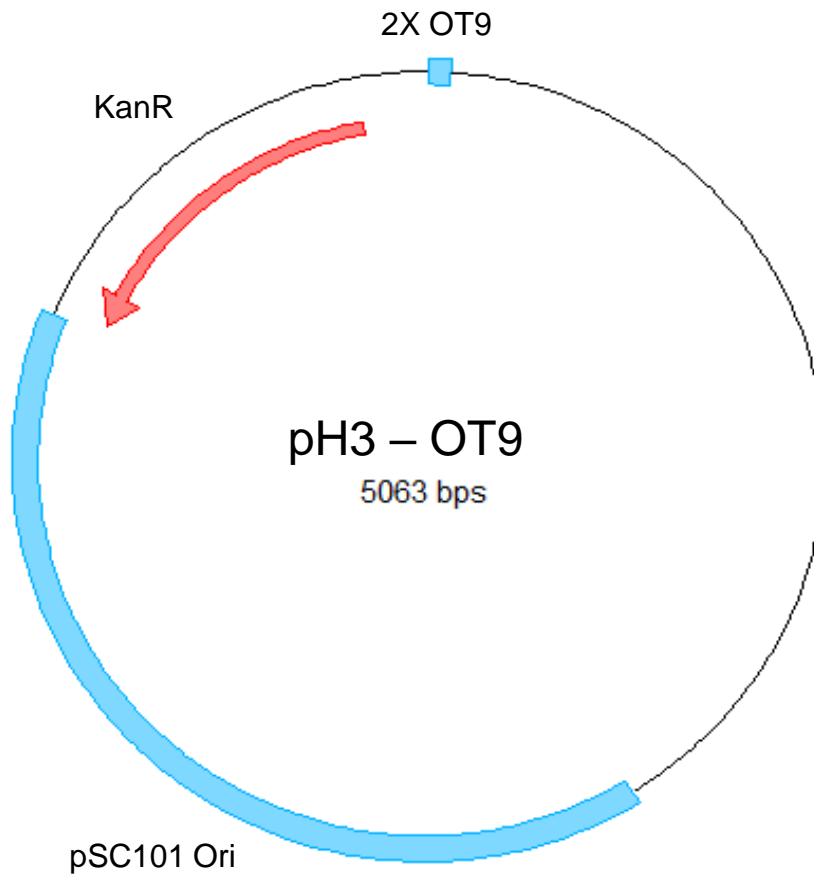

**Supplementary Figure 2: pH3-OT9 Plasmid Map.** This plasmid was used for negative selection. Two gRNA off-target sites (OT9) were inserted in the plasmid to facilitate Cas9 cleavage. The pSC101 origin of replication maintains the plasmid at a low copy number.

### Supplementary Figure 3

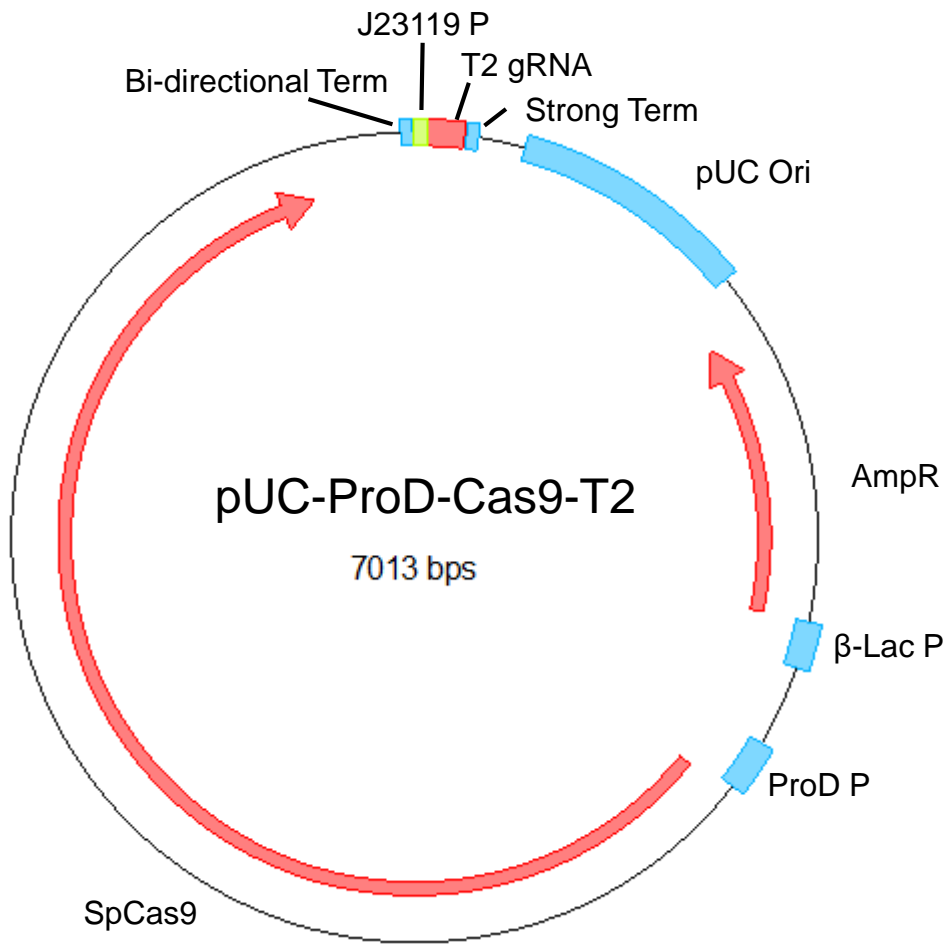

T2 Protospacer: GACCCCCTCCACCCCGCCTC

**Supplementary Figure 3: pUC-ProD-Cas9-T2 Plasmid Map.** This plasmid was used to express SpCas9 and a targeting gRNA (T2). The synthetic, insulated promoter, ProD, constitutively drives SpCas9 expression. The short, synthetic promoter, J23119, has a defined transcription initiation site making it ideal for gRNA expression.

## Supplementary Figure 4

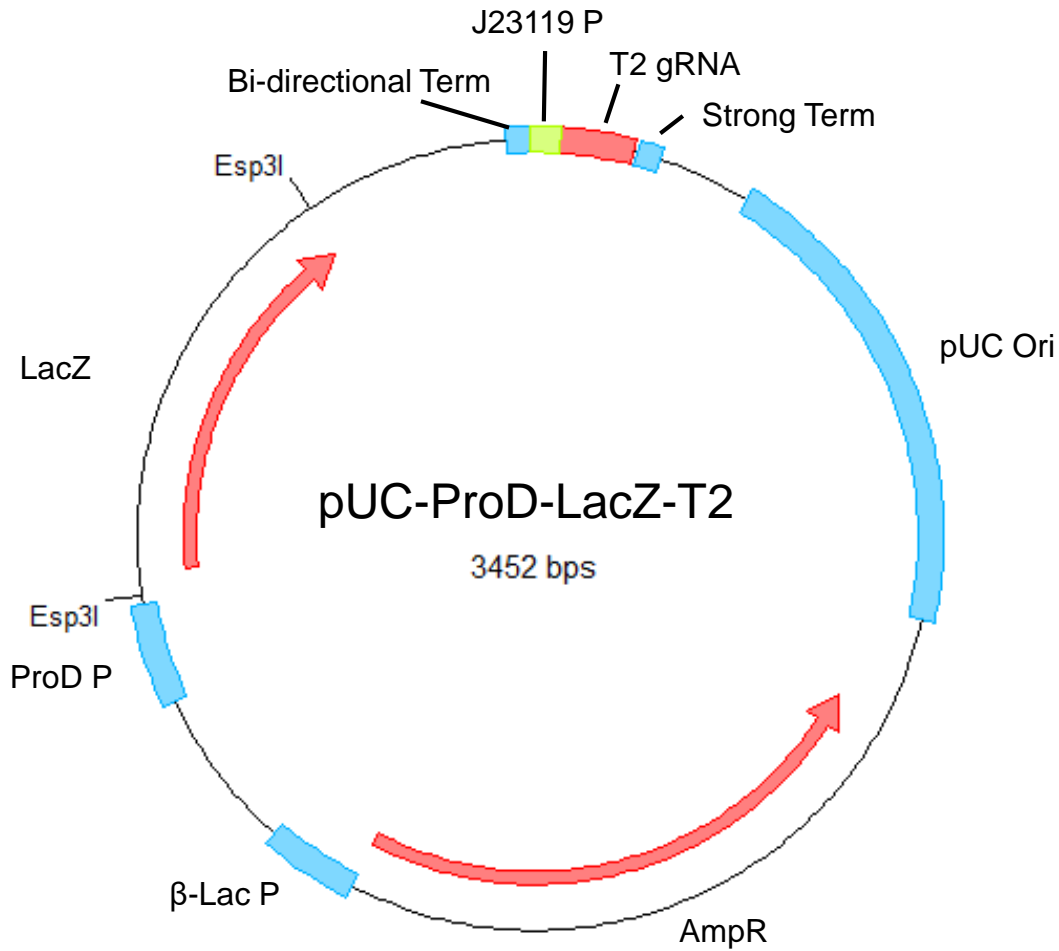

T2 Protospacer: GACCCCCTCCACCCCGCCTC

**Supplementary Figure 4: pUC-ProD-LacZ-T2 Plasmid Map.** This plasmid was used to clone the SpCas9 mutant library. Esp3I sites allow for efficient Golden Gate Cloning of PCR amplicons into the expression cassette.

## Supplementary Figure 5

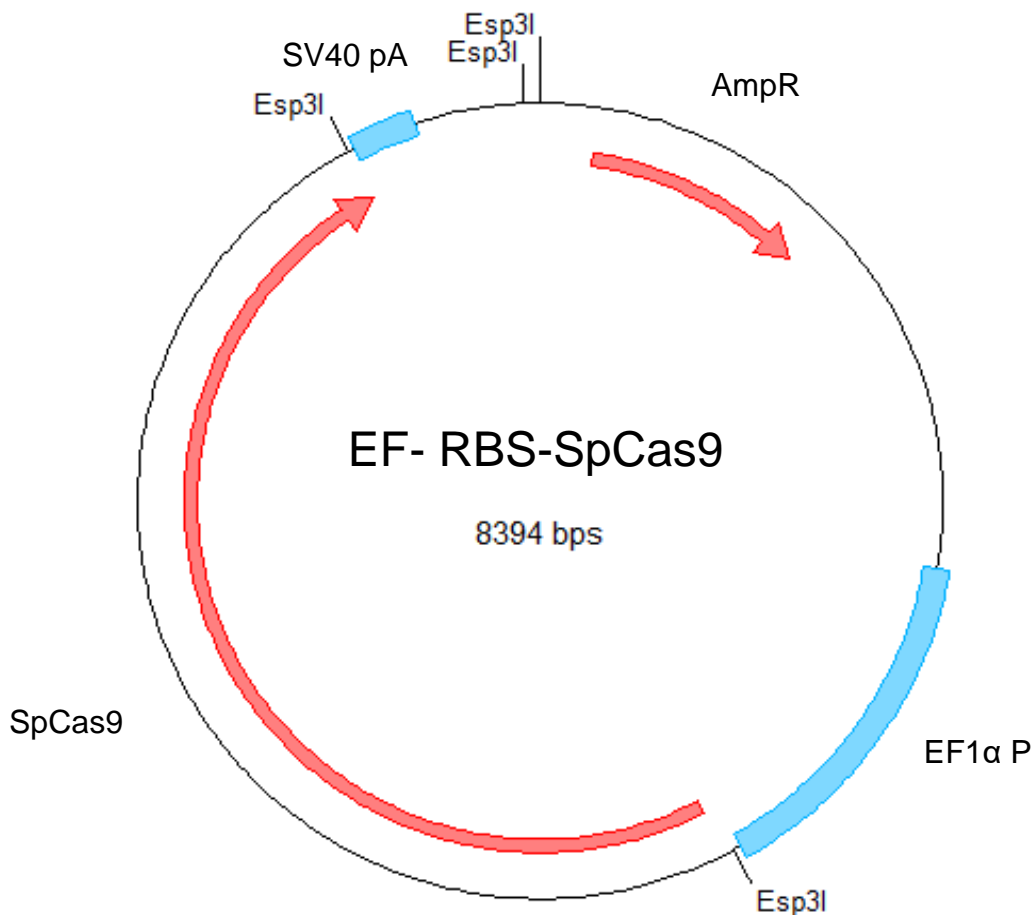

RBS –  
5' – TCACACAGGAAACC – 3'

**Supplementary Figure 5: EF-RBS-SpCas9 Plasmid Map.** This plasmid was generated to create a SpCas9 template with a prokaryotic RBS that was distinct from the desired final product in order to reduce unmutated template background. Additionally, Esp3I sites required for Golden Gate cloning were added to simplify the post-PCR cloning procedure.

# Supplementary Figure 6

## Human Codon Optimized SpCas9 Coding Sequence

NLS HA Tag

```
ATGGATAAAAAATACTCAATCGGGCTGGACATCGGGACCAACTCAGTGGGCTGGGCAGTCATCACAGACGAATACAAAGTCC
CAAGCAAGAAGTTCAAGGTGCTGGGGAACACCGATCGCCACAGTATCAAGAAAAATCTGATTGGGGCCCTGCTGTTGACTC
AGGAGAGACAGCTGAAGCAACTCGGCTGAAAAGAACAGCTCGGAGAAGGTATACTCGCCGAAAGAATCGGATCTGCTACCTC
CAGGAGATTTTCAGCAACGAAATGGCCAAAGTGGACGATAGCTTCTTTCATAGACTGGAGGAATCCTTCTGGTTCGAGGAAG
ATAAGAAACACGAGAGGCATCCCATCTTTGGCAACATTGTGGACGAGGTGCTTATCACGAAAAGTACCCTACTATCTATCAT
CTGCGGAAGAAACTGGTGGACTCTACCGATAAAGCAGACCTGAGACTGATCTATCTGGCCCTGGCTCACATGATTAAGTTCAG
GGGACATTTTCTGATCGAGGGGCGATGAAACCCAGACAAATAGCGATGTGGACAAGCTGTTTCATCCAGCTGGTCCAGACATAC
AATCAGCTGTTTGGAGAAACCCCATTAATGCATCAGGATGGACGCAAAAGCCATCTGAGCGCCCGCTGTCTAAGAGTC
GGAGACTGGAGAACCTGATCGCTCAGCTGCCAGGCGAAAAAGAAAAACGGACTGTTTGGCAATCTGATTGCACTGTCCTGGG
GCTGACACCCAACCTCAAGTCTAATTTTGTCTGGCCGAGGACGCTAAACTGCAGCTGTCTAAGGACACTTATGACGATGACC
TGGATAACCTGCTGGCTCAGATCGGCGATCAGTACGCAGACCTGTTCTGGCCGCTAAGAACTGTCTGACGCCATCCTGCT
GAGTGATATTCTGAGAGTGAACACCGAGATTACAAAAGCCCCCTGAGCGCCAGCATGATCAAGCGGTACGACGAGCACCAT
CAGGATCTGACCCTGCTGAAGGCTGGTGGCGCAGCAGCTGCCTGAGAAGTACAAAAGAAATCTTCTTTGATCAGAGCAAGA
ATGGGTACGCCGATATATTGACGGCGGGGCTTCCAGGAGGAATTCTACAAGTTTATCAAACCTATTCTGGAGAAGATGGAC
GGCACCGAGGAAGTCTGGTGAAGTGAATAGGGAAGACCTGCTGAGGAAGCAGCGCACATTTGATAACGGGAGCATCCCT
CACCAGATTCATCTGGGAGAGCTGCACGCCATCCTGAGGCGCCAGGAAGACTTCTACCCATTTCTGAAGGATAACAGGGAGA
AGATCGAAAAAATCTGACCTCCGCATTCCCTACTATGTGGGACCTCTGGCAAGAGGCAATAGTAGGTTTGCCTGGATGACA
AGAAAATCAGAGGAAACACTCCCTGGAACCTCGAGGAAGTGGTGCATAAGGGCGCTTCCGCACAGCTTTCATTGAGA
GGATGACAAACTTCGACAAGAACCTGCCAAAAGAAAAGTGTGCCAAGCACTCTGCTGTACGAGTATTTACCCTGCTAT
AACGAAGTACAAAAGTGAATACGCTACTGAGGGCATGCGCAAGCCTGCCTTCTGAGCGGGGACAGAAAGAAAGCTATCG
TGGACCTGCTGTTTAAACCAATCGGAAGGTGACAGTCAAGCAGCTGAAAAGAGGACTATTTCAAGAAAATTGAATGTTTCGATT
CTGTGGAGATCAGTGGAGTGAAGACCGGTTCAACGCCAGCCTGGGCACCTACCACGATCTGCTGAAGATCATTAAAGGATAA
AGACTTCTGGACAACGAGGAAAATGAGGATATCCTGGAAGACATTTGTCTGACCCTGACACTGTTTGAAGATAGGAAAT
ATCGAGGAACGCCTGAAGACTTATGCCATCTGTTTCGATGACAAAAGTATGAAACAGCTGAAGCGACGGAGATACACCGGGT
GGGACGACTGTCCCGGAAGCTGATCAATGGCATTAGAGACAAACAGAGCGGGAAGACTATCCTGGACTTTCTGAAATCCGA
TGGCTTCCGCAACAGGAACCTTATGCAGCTGATTACAGTACAGCCTGACCTTCAAAGAGGATATCCAGAAGGCACAGGTG
TCCGGCCAGGGGACTCTCTGCACGAGCATATCGCAAACCTGGCCGGATCCCTGCCATCAAGAAAGGCATTCTGCAGACC
GTGAATGAGTGGTGCAGAGCTGGTGAAGTATGGGGCGCCATAAGCCAGAAAACATCGTATGATGAGTGGCCGAGAAAAT
CAGACCACACAGAAAGGACAGAAAGAACTCAAGGGAGCGCATGAAACGCATCGAGGAAGGGATTAAGGAAGTGGGAAGCCAG
ATCCTGAAAGAGCACCCCGTGGAAAACACTCAGCTGCAGAATGAGAAGCTGTATCTGTACTATCTGCAGAATGGCAGGGATAT
GTACGTGGACCAGGAGCTGGATATTAACCGCCTGTCCGATTATGACGTGGATGCGATCGTCCACAGTCACTTCTGAAAGAT
GACAGCATTTGACAATAAGGTGCTGACCCGCTCTGACAAAACCGAGGGAAAGAGTGATAATGTCCCCTCAGAGGAAGTGGTCA
AGAAAATGAAGAACTACTGGCGGAGCTGTAATGCCAAAACACTGATCACCCAGCGAAAGTTTGATAACCTGACAAAAGCTGA
GCGGGGAGGCCCTGAGTGAAGTGGACAAGCAGGCTTCAATTAAGCGACAGCTGGTGGAGACCCGGCAGATCACAAAGCAGCT
CGCTCAGATTCTGGATAGCCGCATGAACACAAAGTACGATGAGAATGACAAACTGATCCGGGAAGTGAAGGTCACTACTCTGA
AGTCAAACCTGGTGAAGGACTTTCCGAAAGATTTCCAGTTTTATAAGGTGAGAGAGATCAACAACCTACCACCATGCTCATGAC
GCATACCTGAACGCAGTGGTCCGAACCGCCCTGATTAAGAAATACCCTAAACTGGAGAGCGAATTCGTGTACGGCGACTATA
AGGTGATCAGATGTCAGAAAATGATCGCCAAAGTCTGAGCAGGAAATGGCAAAGCCACCCTAAGTATTTCTTTACAGTAAC
ATCATGAATTTCTTTAAGACTGAGATCACCTGGCAAATGGCGAAATCCGAAAAGCGGCCACTGATTGAGACTAACGGCGAGAC
CGGGGAAATCGTGTGGGACAAAGGAGAGATTTTGTACCGTGGAGGAGTCTGAGCATGCCCAAGTGAATATTGTCAAG
AAAACAGAGGTGCAGACTGGGGGATTCAAGTAAGGAATCAATCTGCCTAAACGCAACTCCGATAAGCTGATCGCCCCGAAAGA
AAGACTGGGATCCTAAGAAATATGGCGGGTTCGACTCCCCAACAGTGGCTTACTCTGTCTGGTGGTTCGAAAGGTGGAGAA
GGGAAAAGCAAGAACTGAAATCCGTCAAGGAAGTCTGGGAATCACTATTATGGAGAGAAGCTCCTTCGAAAAGAACTTA
TCGATTTTCTGGAGGCCAAAGGATATAAGGAAGTGAAGAAAGACCTGATCATCAAGCTGCCAAAGTACTCACTGTTTGGAGCTG
GAAAACGGCAGAAAGAGGATGCTGGCAAGCGCCGGCAGCTGCAGAAAGGGAATGAACTGGCCCTGCCCTCCAAGTACGTG
AACTTCTGTATCTGGCTTCTCACTACGAGAAGTCAAAGGACAGTCTGAGGATAACGAACAGAAACAGCTGTTTGTGGAGCA
GCACAAGCATTTACTGACGAGATCATTGAACAGATTAGCGAGTCTCCAAAAGAGTGATCCTGGCTGACGCAAACTGGATA
AGCTGTCTCGCATACAACACCGGATAAGCCAAATCAGAGACAGGCGGAAAATATCATTCTGTTCCACTGACC
AACCTGGGAGCACCAGCAGCCTTCAAGTATTTTGAACACTACCATCGATCGCAAACGATACACATCTACTAAGGAGGTGCTGGA
CGTACCCTGATCCACCAGAGTATTACTGGACTGTACGAGACCAGAATCGACCTGAGTACGCTGGGAGGCGATTCAAGGGCC
GACCCTAAAAAGAAAAGAAAAGTCTGTACATATCCCTATGATGTCCCTGATTATGCCATAA
```

**Supplementary Figure 6: Coding Sequence of SpCas9.** The human optimized CDS of SpCas9 that we used in this study. The added NLS is in blue while the HA tag is in red.

## Supplementary Figure 7

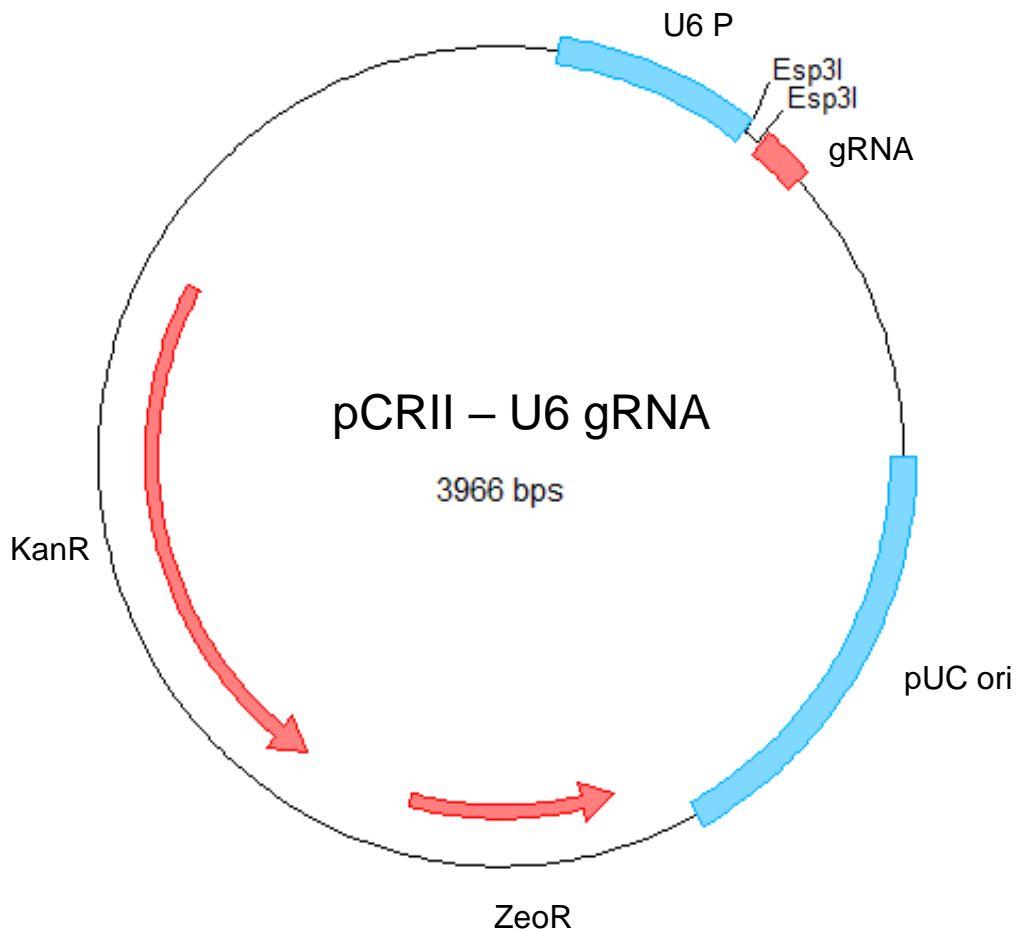

**Supplementary Figure 7: pCRII – U6 gRNA Plasmid Map.** The plasmid used to express gRNAs in mammalian cells drives gRNA expression with the U6 promoter. The cloning vector with a 34 bp insert was used to as a non-targeting control in gRNA transfections. Oligos were used to generate gRNAs by digesting the plasmid with Esp3I followed or in concert with ligation.



## Supplementary Figure 8

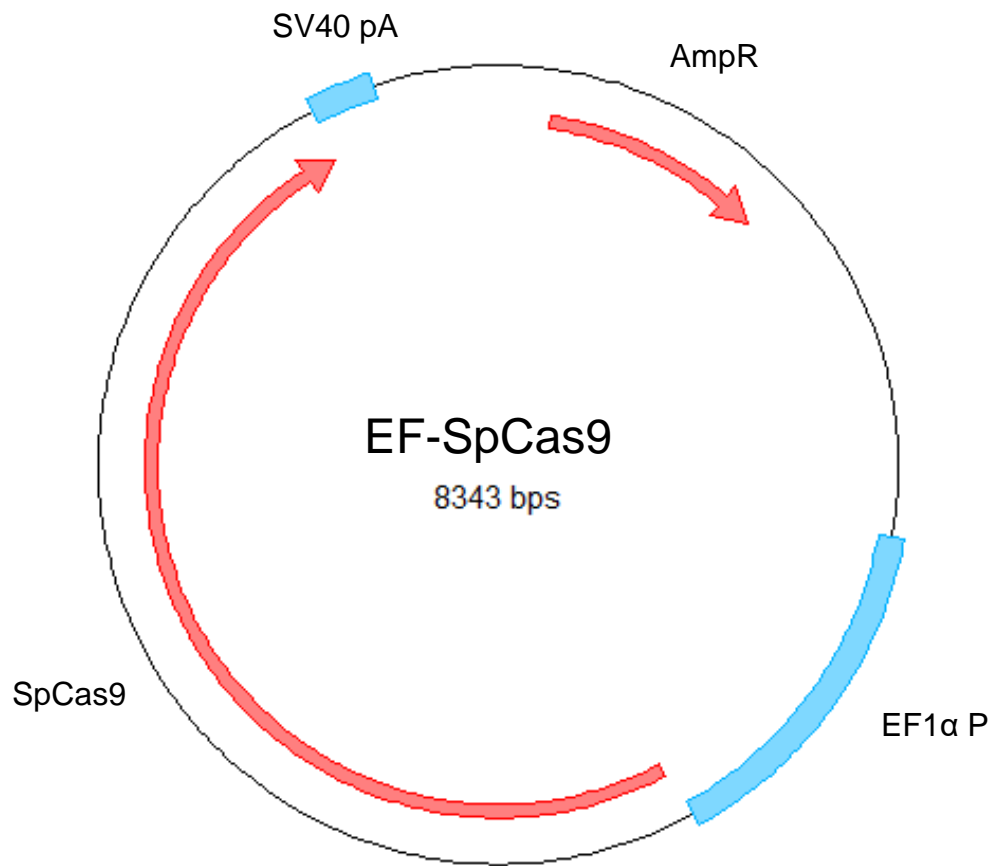

**Supplementary Figure 8: EF-SpCas9 Plasmid Map.** The plasmid used to express SpCas9 in mammalian cells drives SpCas9 expression with the EF1 $\alpha$  promoter and terminates transcription with the SV40 pA signal.

## Supplementary Figure 9

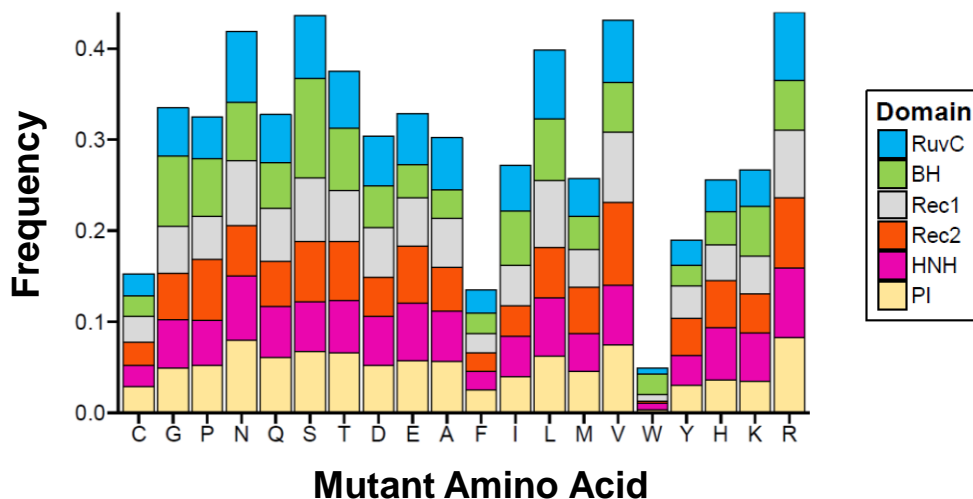

**Supplementary Figure 9: Frequencies of specific amino acid substitutions by domain.** Instances of amino acid substitutions from Fig. 2b were normalized by the total number of amino acids in each domain.

## Supplementary Figure 10

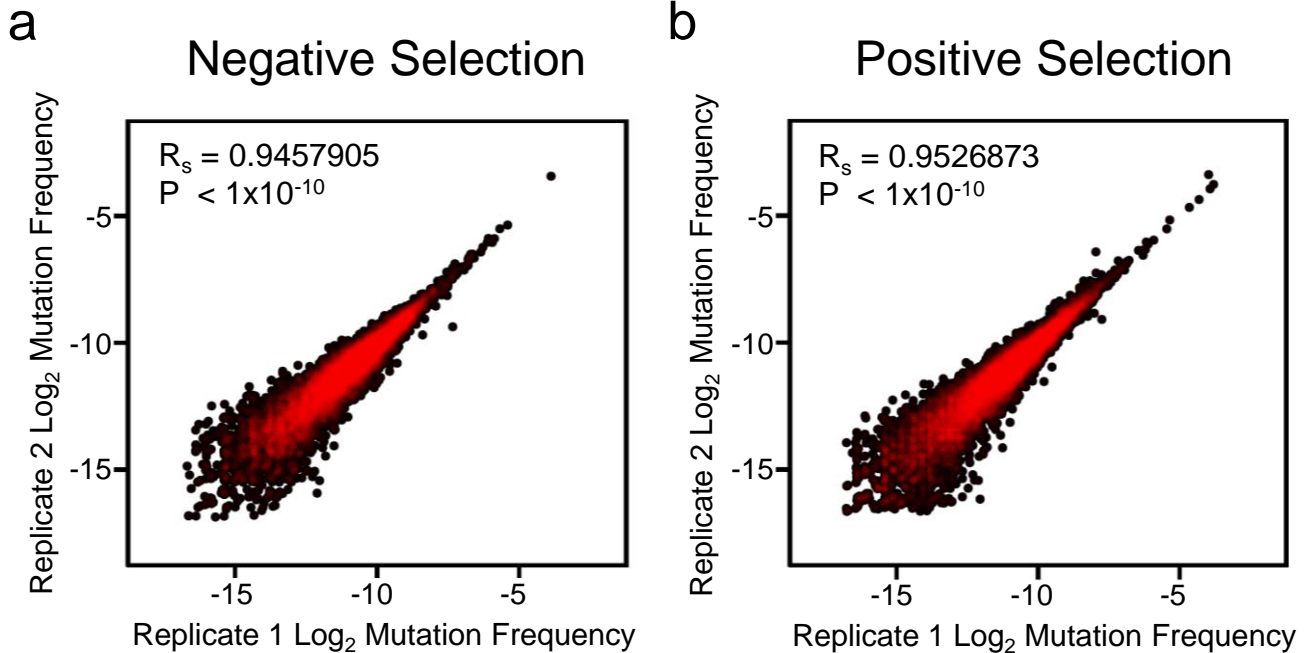

### **Supplementary Figure 10: Correlation of selection replicates.**

Selection replicates were converted to frequencies by adding one to the numerator and denominator of counts before calculating Spearman's Rho. Shown are representative plots of  $\text{log}_2$  transformed frequencies and calculations from each selection.

# Supplementary Figure 11

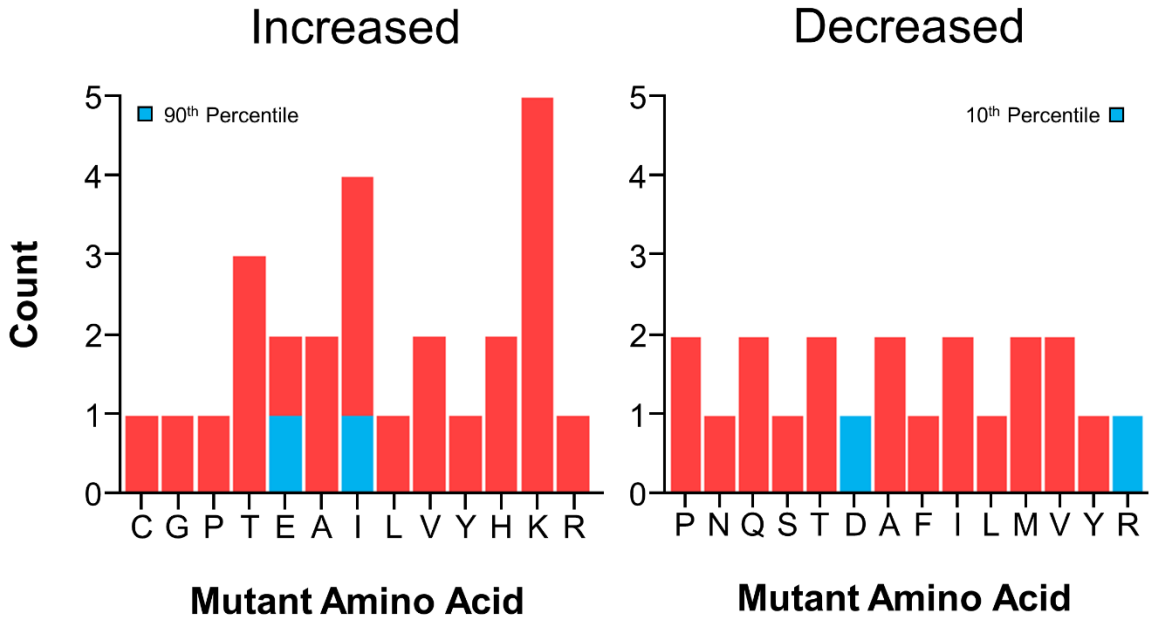

**Supplementary Figure 11: Enriched and depleted mutations from negative selection.** Histograms showing the number of enriched (Increased) or depleted (Decreased) amino acid mutations from negative selection. The top enriched and depleted mutations are colored in blue.

## Supplementary Figure 12

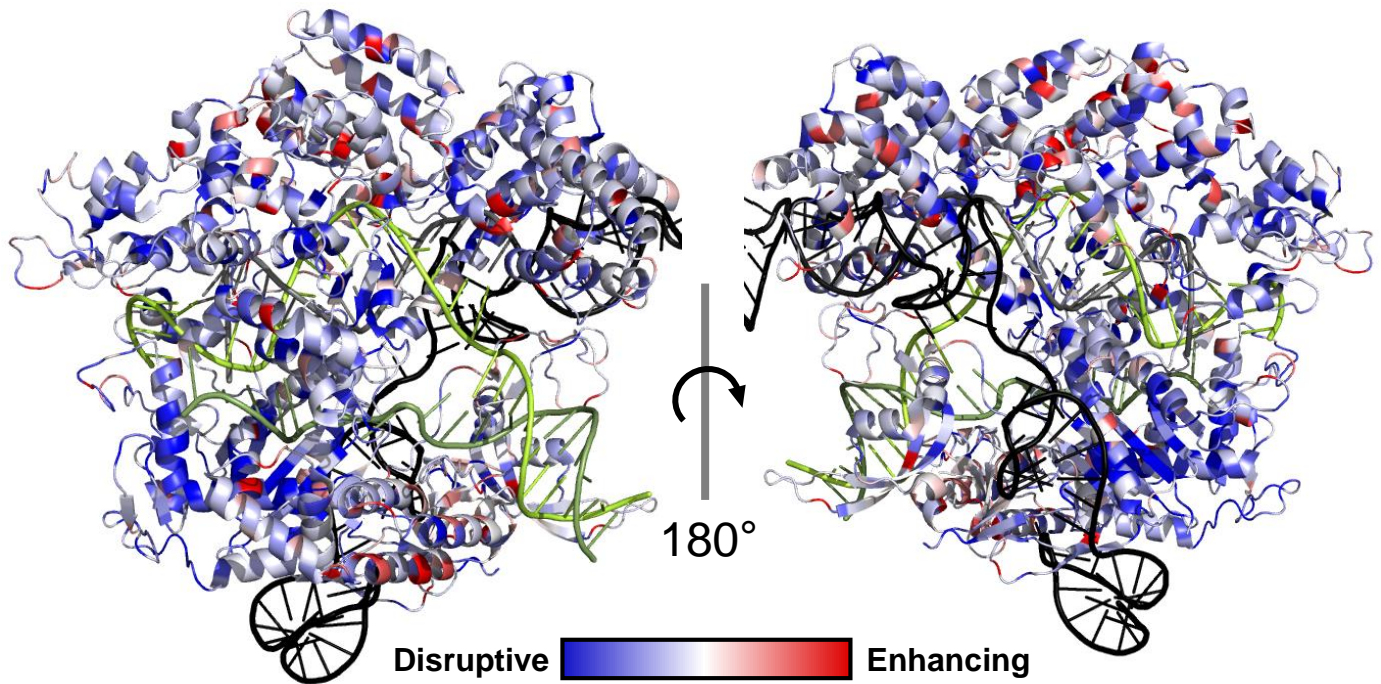

**Supplementary Figure 12: Mutability score mapped onto the SpCas9 crystal structure.** Mutability scores were calculated for each residue as explained in the methods. These scores were then mapped on the cartoon structure of SpCas9 bound to gRNA and dsDNA based on PDB: 5f9r (ref. 27). Red indicates residues with a mutability score that is greater than zero. Blue indicates a mutability score less than zero. White indicates a mutability score of zero. Color intensity is saturated at the top and bottom ten percentiles.

## Supplementary Figure 13

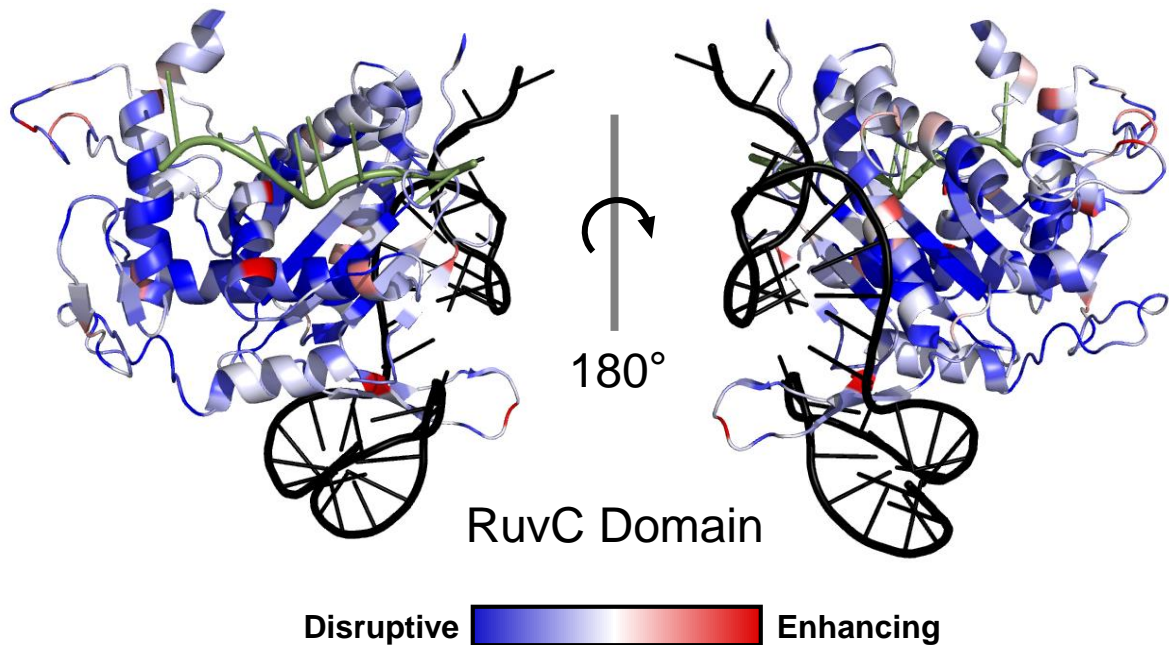

**Supplementary Figure 13: Mutability score mapped onto the RuvC domain.** A close-up view of the RuvC domain, colored as in Supplementary Fig. 12. Other domains have been removed for clarity.

## Supplementary Figure 14

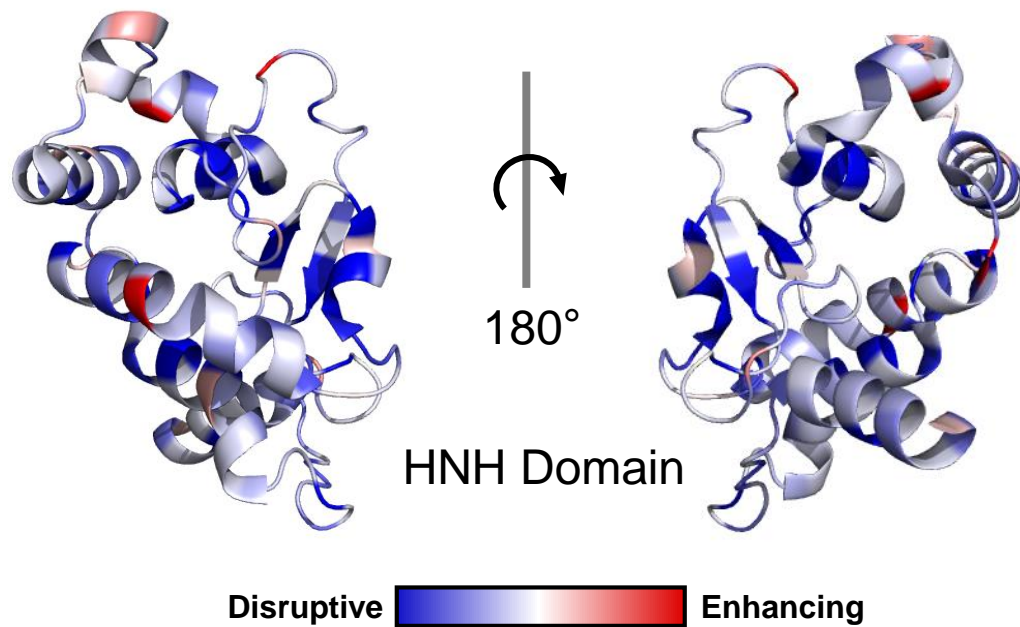

**Supplementary Figure 14: Mutability score mapped onto the HNH domain.** A close-up view of the HNH domain, colored as in Supplementary Fig. 12. Other domains have been removed for clarity.

## Supplementary Figure 15

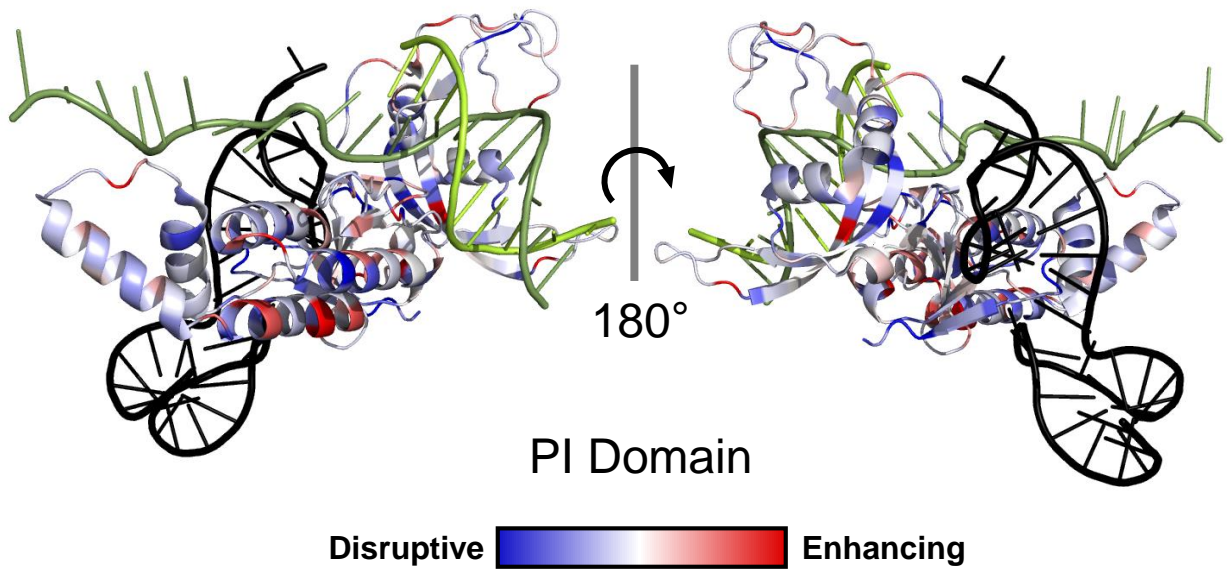

**Supplementary Figure 15: Mutability score mapped onto the PI domain.** A close-up view of the PI domain, colored as in Supplementary Fig. 12. Other domains have been removed for clarity.



## Supplementary Figure 16

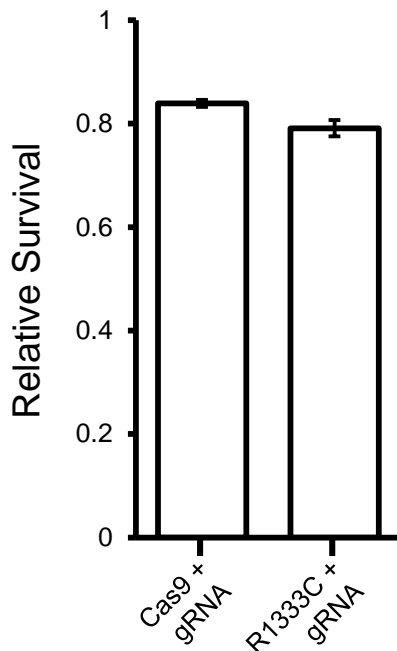

### **Supplementary Figure 16: Activity of R133C SpCas9 in *E. coli*.**

The positive selection plasmid was transformed along with an R1333C expression plasmid as in Figure 1 (n=3, error bars indicate S.E.M.). The results from the transformation are shown alongside WT SpCas9 results from Figure 1c for comparison.

# Supplementary Figure 17

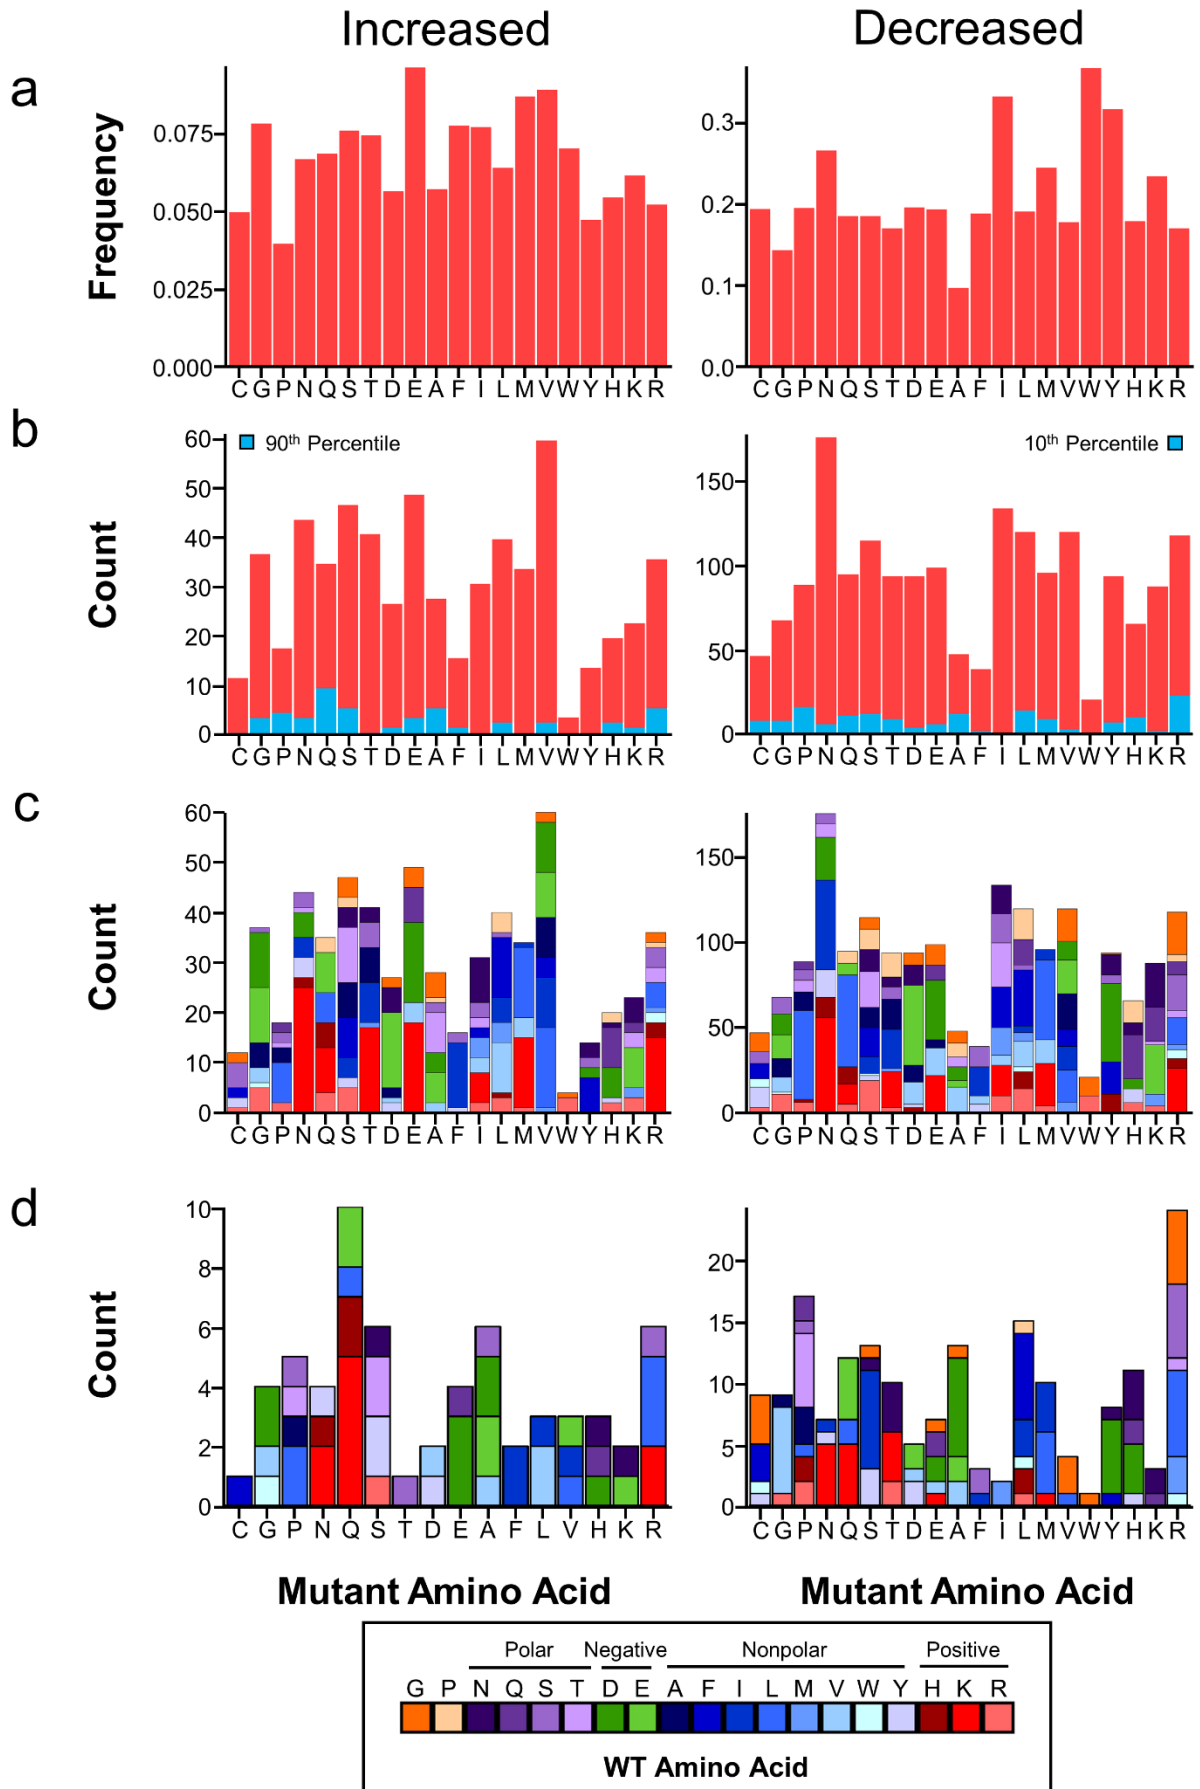

**Supplementary Figure 17: Enriched and depleted mutations from positive selection.** (a) Significantly enriched (Increased) or depleted (Decreased) mutation counts of each amino acid were divided by the total number instances of that mutation in the initial library. The frequency indicates the fraction of each amino acid mutation that was significantly enriched or depleted following positive selection. (b) Histograms showing the number of enriched or depleted amino acid mutations from positive selection. The top enriched and depleted mutations are colored in blue. (c) Same counts as in b, but colored by the WT amino acid that the mutation was substituting. (d) The top and bottom ten percent of enriched and depleted mutations colored as in c.

## Supplementary Figure 18

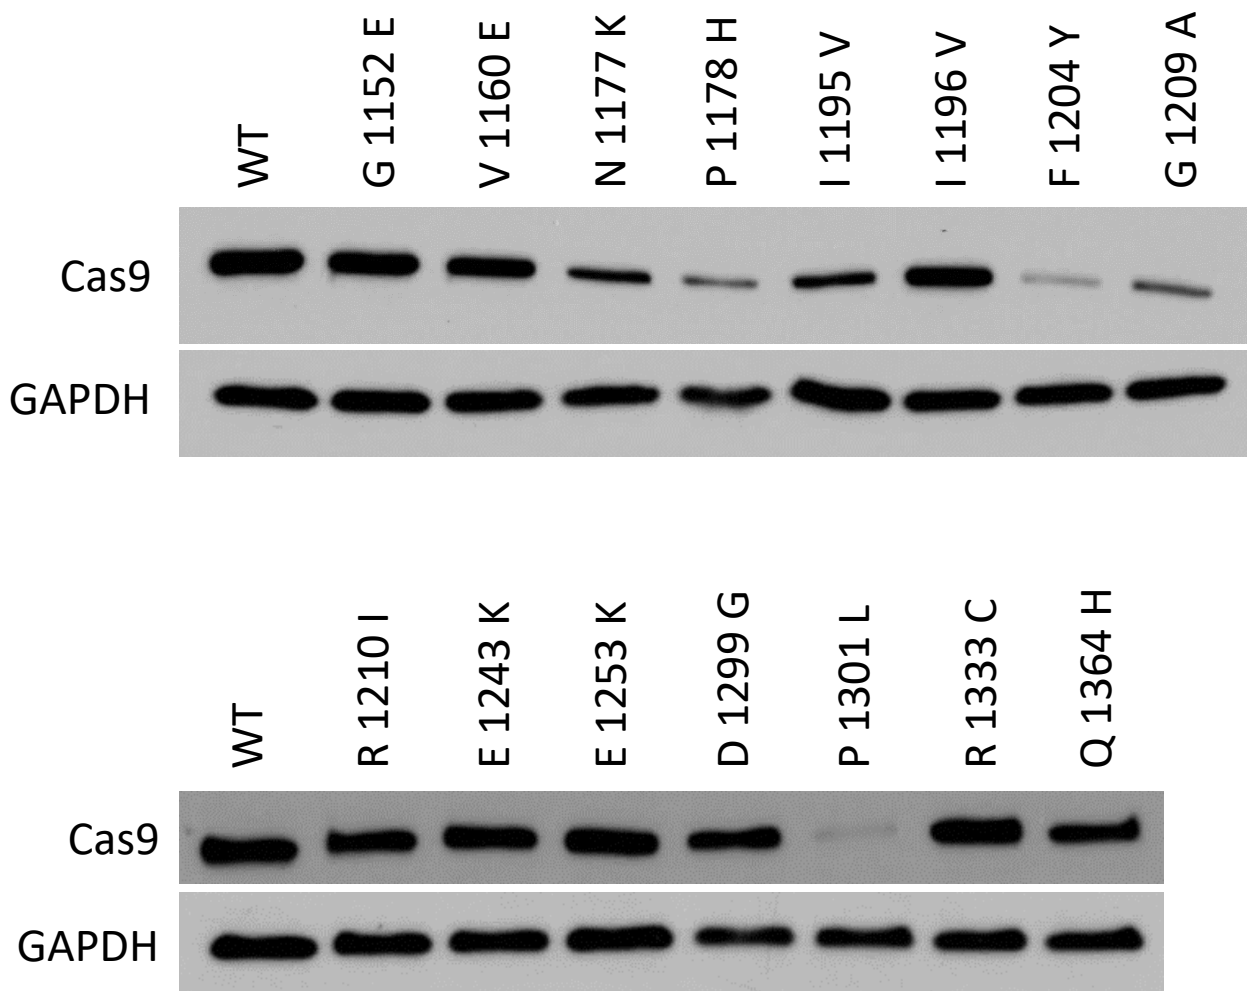

**Supplementary Figure 18: Expression of specificity enhancing mutant Cas9s.** Western blots of SpCas9 mutations from Fig. 4.

# Supplementary Figure 19

a

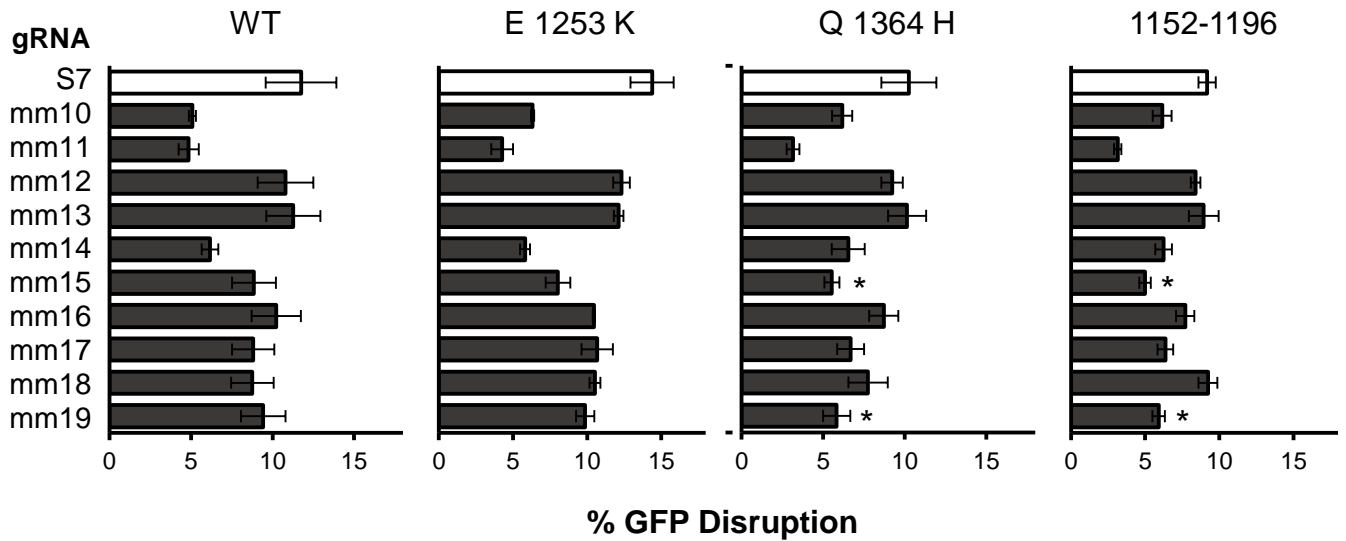

b

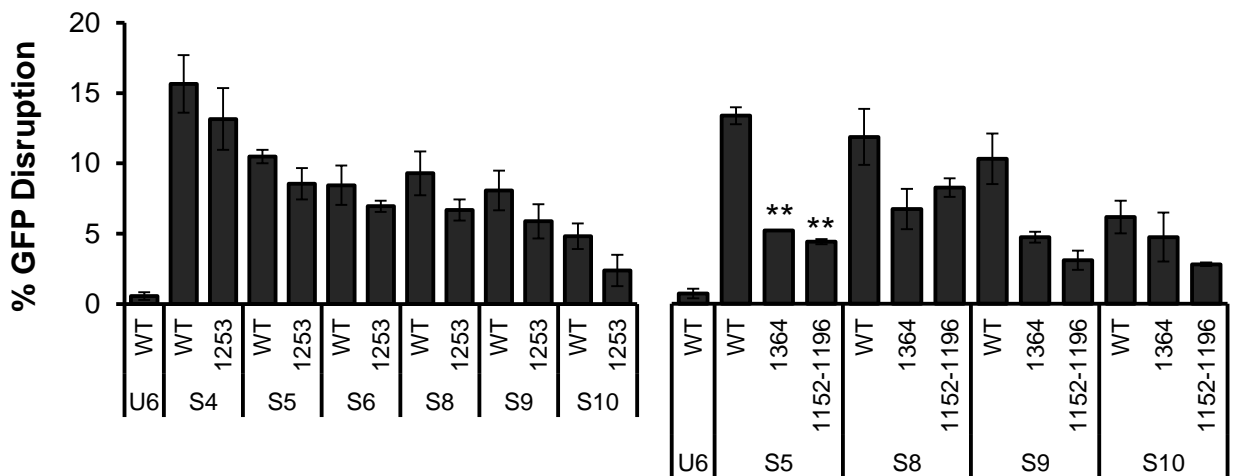

**Supplementary Figure 19: General activity of doubly selected mutants.** (a) Mutants from Figure 4 were assessed with an additional site 7 gRNA (S7) and their ability to tolerate single mismatches at the 5' end of the protospacer (n = 3, error bars indicate S.E.M.). Mismatches at the 15<sup>th</sup> (one-way ANOVA  $F_{3,8} = 4.94$ ,  $P = 0.032$ , followed by post hoc linear contrasts) and 19<sup>th</sup> position impaired function more than with WT for two of the mutants (one-way ANOVA  $F_{3,8} = 6.14$ ,  $P = 0.018$ , followed by post hoc linear contrasts). (b) These mutants were further assayed

with additional GFP-targeting gRNAs to determine their general on-target activity (n = 2, error bars indicate S.E.M., two-tailed Student's t-test, P = \* < 0.05, \*\* < 0.01, \*\*\* < 0.001).

# Supplementary Figure 20

## 12 mismatched

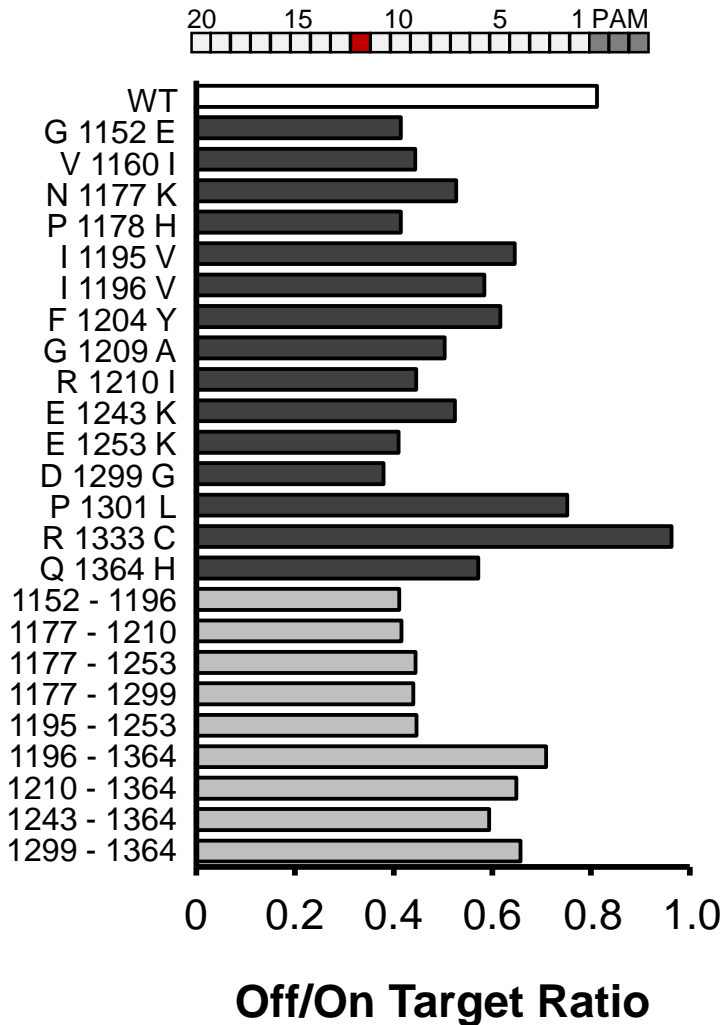

**Supplementary Figure 20: Off/On Target Ratio of positive and negative selection enriched mutants.** The off-target activity of each SpCas9 variant with the position 12 mismatched gRNA from Fig. 4 were divided by the on-target activity of each variant.

## Supplementary Figure 21

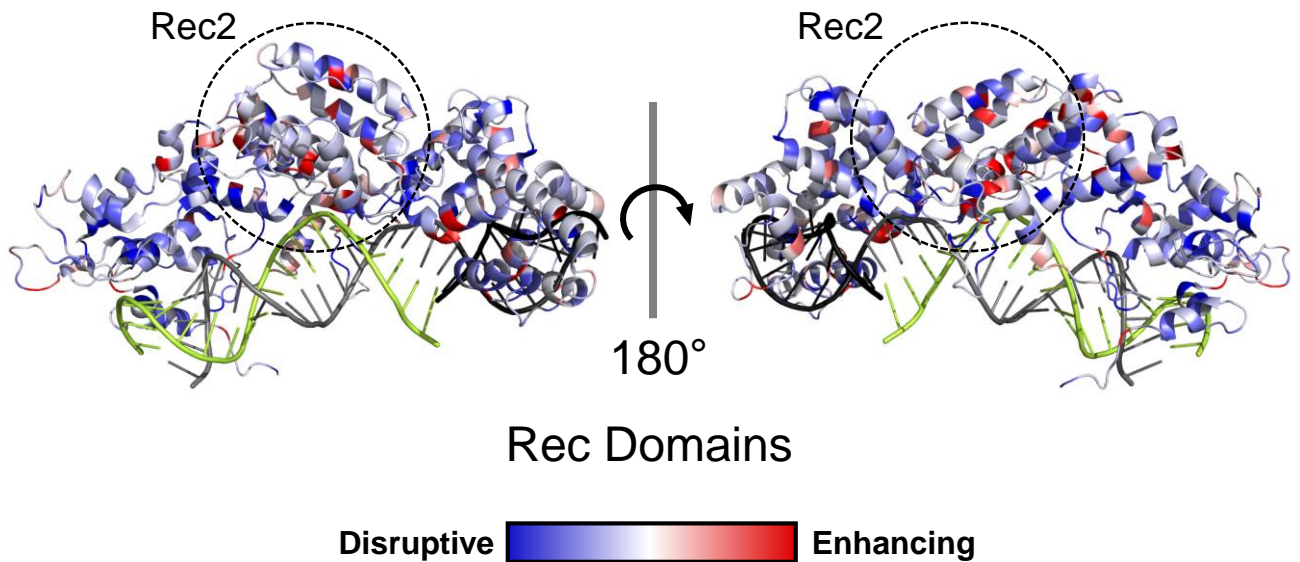

**Supplementary Figure 21: Mutability score mapped onto the Rec domains.** A close-up view of the Rec domains, colored as in Supplementary Fig. 12. Other domains have been removed for clarity. The Rec2 domain is enclosed in a dashed circle.



## Supplementary Figure 22

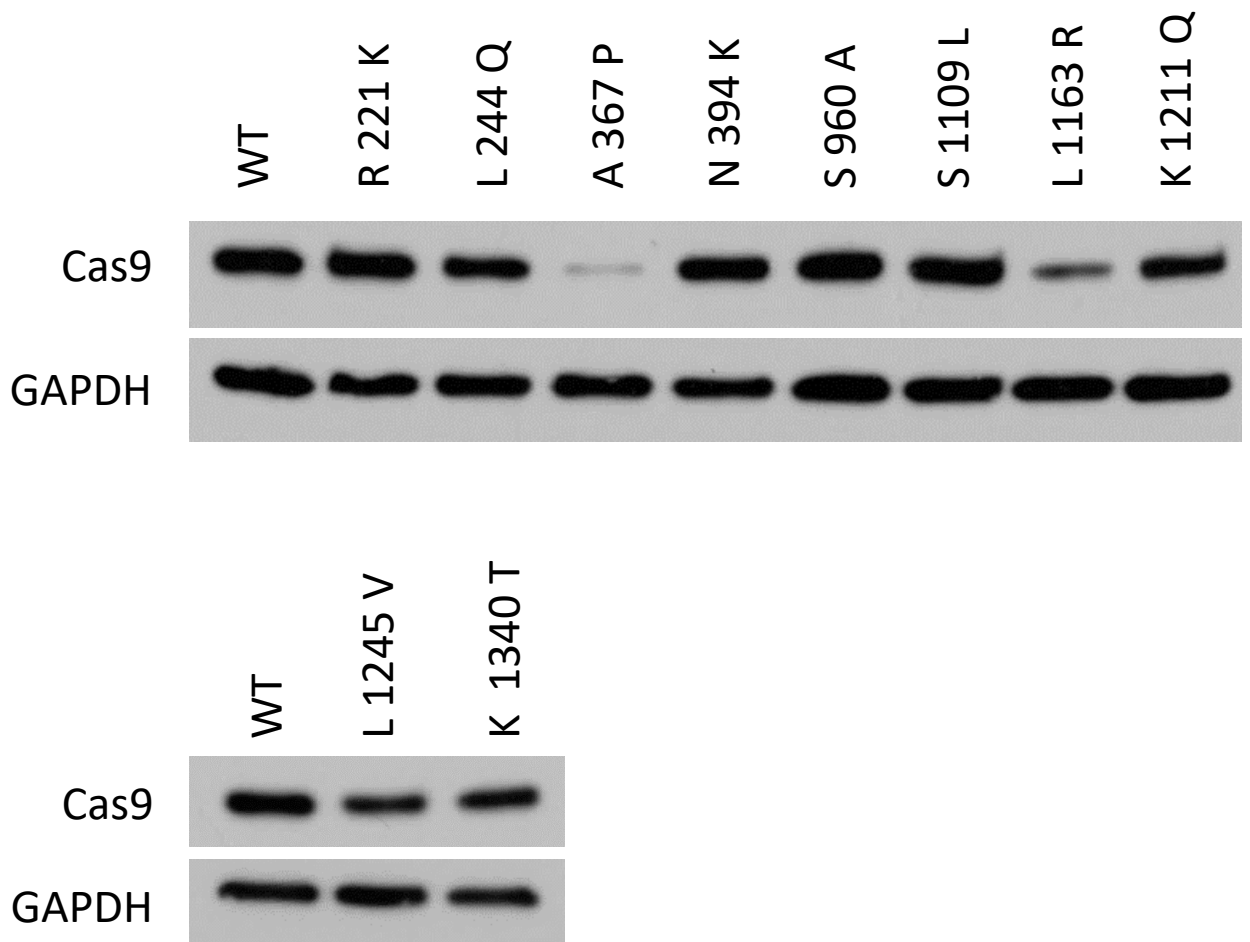

**Supplementary Figure 22: Expression of enhancing mutation Cas9s.** Western blots of SpCas9 mutations from Fig. 7.

# Supplementary Figure 23

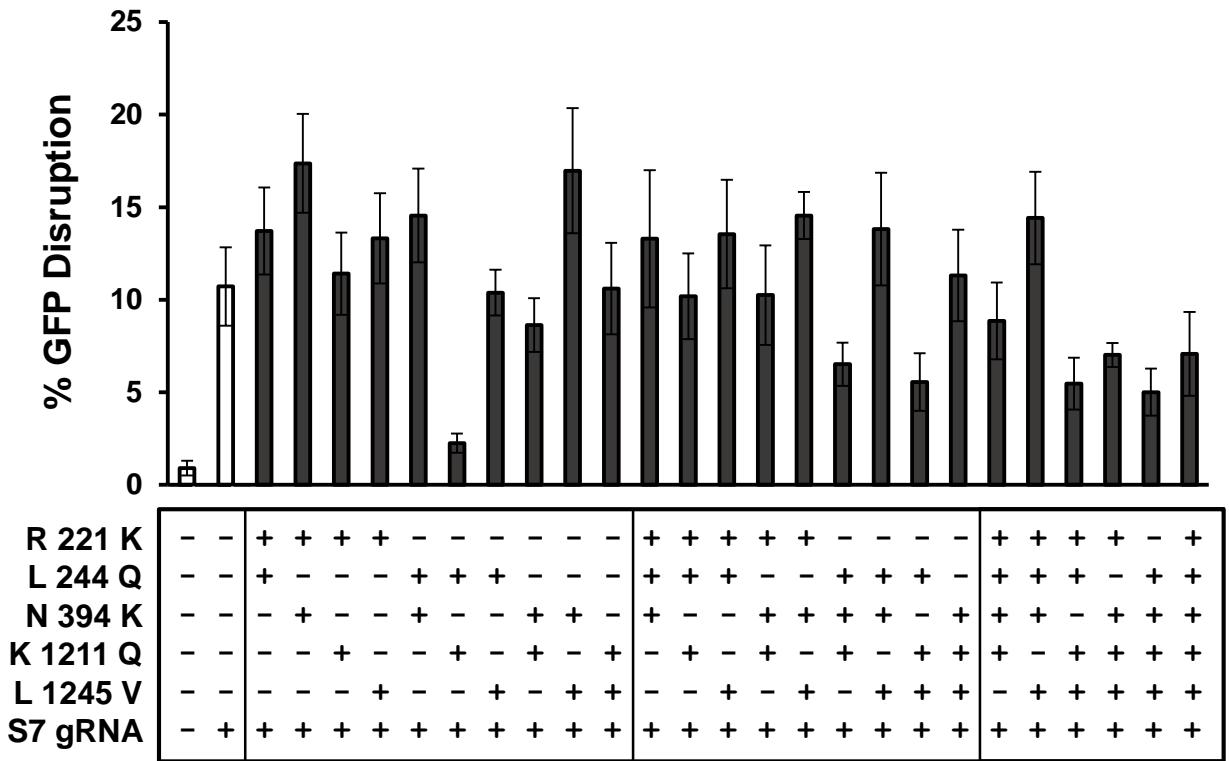

**Supplementary Figure 23: Activity of combination mutants with site 7 gRNA.** Combinations of mutations that had retained activity in mammalian cells as single mutants were compared to WT SpCas9's ability to cleave with a gRNA targeting GFP site 7 (S7) (n = 3, error bars indicate S.E.M.).

## Supplementary Figure 24

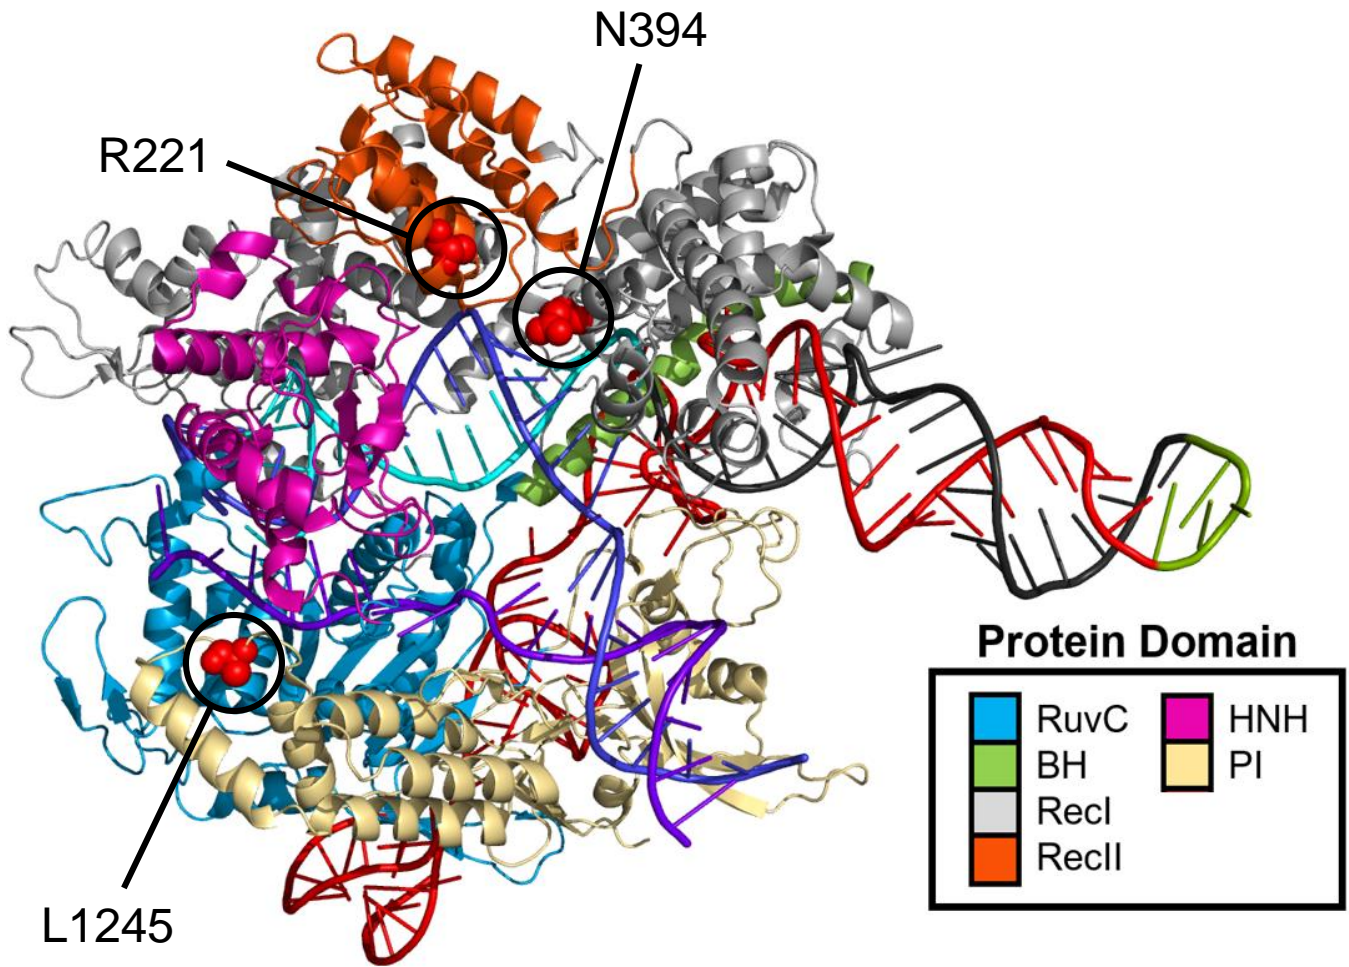

### Supplementary Figure 24: Location of activating mutations.

Cartoon structure of SpCas9 bound to gRNA and dsDNA based on PDB: 5f9r (ref. 27). Domains are colored as in Figure 4. The mutations which alter SpCas9 activity are shown as red spheres.

# Supplementary Table 1: Primers used in this study

| Name                                         | Sequence (5' - 3')                                                    | Description                  |
|----------------------------------------------|-----------------------------------------------------------------------|------------------------------|
| <b>pACYC184 -tacP- ccdB -T2 Construction</b> |                                                                       |                              |
| tacP For                                     | CCGAGCTGTTGACAATTAATCATCGGCTGTATAATGTGTGGAATTGT<br>GAGCGGATAACAATTTCA | tacP ccdB amplicon primer    |
| ccdB Rev                                     | GTTTAAACTTCATCCGGGGTCAGCACCGTTTCT                                     | tacP ccdB amplicon primer    |
| <b>Mutagenesis</b>                           |                                                                       |                              |
| EF For                                       | CACACTGAGTGGGTGGAGACTG                                                | Mutagenesis Primer           |
| Sv40 For                                     | TTAATTA AAACTTGTTTATTGCAGCTTATAATG                                    | Mutagenesis Primer           |
| <b>EF- RBS-SpCas9 Construction</b>           |                                                                       |                              |
| SV40 POE For                                 | GCCTAACGTGAGACGAAGGATGCGGCCGCGACATGATAAGATACA<br>TTGA                 | POE-PCR Vector Primer        |
| EF- POE - Rev                                | TGTGTGAAGAGACGAGAGA ACTGGGTGGCGCTAGTGAATTCCTCA<br>CGAC                | POE-PCR Vector Primer        |
| Cas9 RBS For 4                               | CAGTTCTCTCGTCTCTTCACACAGGAAACCTCATAGATGGATAAAAA<br>ATACTCAATCGGGCTGGA | POE-PCR Cas9 amplicon Primer |
| HA Rev 4                                     | CATCCTTCGTCTCACGTTAGGCATAATCAGGGACATCATAGGGA                          | POE-PCR Cas9 amplicon Primer |
| <b>Mutation Cloning Primers</b>              |                                                                       |                              |
| G-Cas For                                    | AAAATACTCAATCGGGCTGGACATCGGGA                                         | N-terminal Fragment Primer   |
| G-Cas Rev                                    | CGCTTAGGCATAATCAGGGACATCATAGGGA                                       | C-terminal Fragment Primer   |
| 1152-E For                                   | GGTCGCAAAGGTGGAGAAGGAGAAAAGCAAGAACTGAAATC                             | 1152-E Cloning               |
| 1152-E Rev                                   | GATTTTCAGTTTCTTGCTTTTCTCCTTCTCCACCTTTGCGACC                           | 1152-E Cloning               |
| 1160-I For                                   | AAAGCAAGAAACTGAAATCCATCAAGGAACTGCTGGGAATC                             | 1160-I Cloning               |
| 1160-I Rev                                   | GATTCCCAGCAGTTCCTTGATGGATTTTCAGTTTCTTGCTTT                            | 1160-I Cloning               |
| 1177-K For                                   | AGAAGCTCCTTCGAAAAGAAACCTATCGATTTTCTGGAGGC                             | 1177-K Cloning               |
| 1177-K Rev                                   | GCCTCCAGAAAATCGATAGGTTTCTTTTCGAAGGAGCTTCT                             | 1177-K Cloning               |
| 1178-H For                                   | AAGCTCCTTCGAAAAGAATCATATCGATTTTCTGGAGGCCAAAG                          | 1178-H Cloning               |
| 1178-H Rev                                   | CTTTGGCCTCCAGAAAATCGATATGATTCTTTTCGAAGGAGCTT                          | 1178-H Cloning               |
| 1195-V For                                   | AGGAAGTGAAGAAAGACCTGGTCATCAAGCTGCCAAAGTAC                             | 1195-V Cloning               |
| 1195-V Rev                                   | GTA CTTTGGCAGCTTGATGACCAGGTCTTTCTTCACTTCT                             | 1195-V Cloning               |
| 1196-V For                                   | AAGTGAAGAAAGACCTGATCGTCAAGCTGCCAAAGTACTCAC                            | 1196-V Cloning               |
| 1196-V Rev                                   | GTGAGTACTTTGGCAGCTTGACGATCAGGTCTTTCTTCACTT                            | 1196-V Cloning               |
| 1204-Y For                                   | AGCTGCCAAAGTACTCACTGTATGAGCTGGAAAACGGCAGAAAG                          | 1204-Y Cloning               |
| 1204-Y Rev                                   | CTTTCTGCCGTTTTCCAGCTCATACAGTGAGTACTTTGGCAGCT                          | 1204-Y Cloning               |
| 1209-A For                                   | ACTGTTTGAGCTGGAAAACGCCAGAAAGAGGATGCTGGCAAG                            | 1209-A Cloning               |
| 1209-A Rev                                   | CTTGCCAGCATCCTCTTTCTGGCGTTTTCCAGCTCAAACAGT                            | 1209-A Cloning               |
| 1210-I For                                   | GTTTGAGCTGGAAAACGGCATAAAGAGGATGCTGGCAAGCG                             | 1210-I Cloning               |
| 1210-I Rev                                   | CGCTTGCCAGCATCCTCTTTATGCCGTTTTCCAGCTCAAAC                             | 1210-I Cloning               |

|            |                                                        |                |
|------------|--------------------------------------------------------|----------------|
| 1243-K For | TGTATCTGGCTTCTCACTACAAGAAGCTGAAAGGCAGTCCTG             | 1243-K Cloning |
| 1243-K Rev | CAGGACTGCCTTTCAGCTTCTTGTAGTGAGAAGCCAGATACA             | 1243-K Cloning |
| 1253-K For | AAGGCAGTCCTGAGGATAACAACAGAAACAGCTGTTTGTG               | 1253-K Cloning |
| 1253-K Rev | CACAAACAGCTGTTTCTGTTTGTATCCTCAGGACTGCCTT               | 1253-K Cloning |
| 1299-G For | CGCATACAACAACACCGGGGTAAGCCAATCAGAGAGCAGG               | 1299-G Cloning |
| 1299-G Rev | CCTGCTCTCTGATTGGCTTACCCCGGTGTTTGTGTATGCG               | 1299-G Cloning |
| 1301-L For | CATACAACAACACCGGGGATAAGCTAATCAGAGAGCAGGCCGAAAA<br>TATC | 1301-L Cloning |
| 1301-L Rev | GATATTTTCGGCCTGCTCTCTGATTAGCTTATCCCGGTGTTTGTGT<br>ATG  | 1301-L Cloning |
| 1333-C For | GTATTTTGACACTACCATCGATTGCAAACGATACACATCTACTAAG         | 1333-C Cloning |
| 1333-C Rev | CTTAGTAGATGTGTATCGTTTGCAATCGATGGTAGTGCAAATAC           | 1333-C Cloning |
| 1364-H For | CGAGACCAGAATCGACCTGAGTCACCTGGGAGGCGATTCAAGGGC<br>C     | 1364-H Cloning |
| 1364-H Rev | GGCCCTTGAATCGCCTCCCAGGTGACTCAGGTCGATTCTGGTCTCG         | 1364-H Cloning |
| 221-K For  | CCGCCTGTCTAAGAGTCGGAAACTGGAGAACCTGATCGCT               | 221-K Cloning  |
| 221-K Rev  | AGCGATCAGGTTCTCCAGTTTCCGACTCTTAGACAGGCGG               | 221-K Cloning  |
| 244-Q For  | GGACTGTTTGGCAATCTGATTGCACAGTCCCTGGGGCTGACACCCA<br>AC   | 244-Q Cloning  |
| 244-Q Rev  | GTTGGGTGTCAGCCCCAGGGACTGTGCAATCAGATTGCCAAACAGT<br>CC   | 244-Q Cloning  |
| 367-P For  | CCGGATATATTGACGGCGGGCCTTCCCAGGAGGAATTCTACAAG           | 367-P Cloning  |
| 367-P Rev  | CTTGTAGAATTCCTCCTGGGAAGGCCCGCGTCAATATATCCGG            | 367-P Cloning  |
| 394-K For  | AGGAACTGCTGGTGAAGTGAAGAGGGAAGACCTGCTGAGGAAGC<br>A      | 394-K Cloning  |
| 394-K Rev  | TGCTTCCTCAGCAGGTCTTCCCTCTTCAGTTTCACCAGCAGTTCCT         | 394-K Cloning  |
| 960-A For  | GGAAGTGAAGGTCATTAATCTGAAGGCAAACTGGTGAGCGACTTT<br>CGG   | 960-A Cloning  |
| 960-A Rev  | CCGAAAGTCGCTCACCAGTTTTGCCTTCAGAGTAATGACCTTCACTT<br>CC  | 960-A Cloning  |
| 1109-L For | GGATTCAGTAAGGAATTAATTCTGCCTAAACGCAACTCCGATAAG          | 1109-L Cloning |
| 1109-L Rev | CTTATCGGAGTTGCGTTTAGGCAGAATTAATTCCTTACTGAATCC          | 1109-L Cloning |
| 1163-R For | AGAACTGAAATCCGTCAAGGAACGGCTGGGAATCACTATTATGGA<br>GAG   | 1163-R Cloning |
| 1163-R Rev | CTCTCCATAATAGTGATTCCCAGCCGTTCTTGACGGATTTTCAGTTT<br>CT  | 1163-R Cloning |
| 1211-Q For | GCCTGACCTTCAAAGAGGATATCCAGAAGGCAGAGGTGTCCGGCC<br>AGG   | 1211-Q Cloning |
| 1211-Q Rev | CCTGGCCGGACACCTCTGCCTTCTGGATATCCTCTTTGAAGGTCAG<br>GC   | 1211-Q Cloning |
| 1245-V For | ATCTGGCTTCTCACTACGAGAAGGTGAAAGGCAGTCCTGAGGATAA<br>CG   | 1245-V Cloning |
| 1245-V Rev | CGTTATCCTCAGGACTGCCTTTCACCTTCTCGTAGTGAGAAGCCAG<br>AT   | 1245-V Cloning |
| 1340-T For | GATCGCAAACGATACACATCTACTACGGAGGTGCTGGACGCTACCC<br>TG   | 1340-T Cloning |
| 1340-T Rev | CAGGGTAGCGTCCAGCACCTCCGTAGTAGATGTGTATCGTTTGCGA<br>TC   | 1340-T Cloning |

| NGS Primers |                                                                         |                             |
|-------------|-------------------------------------------------------------------------|-----------------------------|
| ProD For    | GGGCATGCATAAGGCTCGTATAATA                                               | Initial Sequencing Amplicon |
| Omega Rev2  | GCAGCGCGATTACAGTGGTTT                                                   | Initial Sequencing Amplicon |
| Spfor-3     | TCGTCGGCAGCGTCAGATGTGTATAAGAGACAGNNNNNNNNNa<br>gctcacacaggaaacctca      | Fragment 1 Amplicon         |
| Sprev214    | GTCTCGTGGGCTCGGAGATGTGTATAAGAGACAGNNNNNNNNN<br>tccgattcttcggcgagta      | Fragment 1 Amplicon         |
| Spfor215    | TCGTCGGCAGCGTCAGATGTGTATAAGAGACAGNNNNNNNNNa<br>gaacagctcggagaaggta      | Fragment 2 Amplicon         |
| Sprev442    | GTCTCGTGGGCTCGGAGATGTGTATAAGAGACAGNNNNNNNNN<br>agatcagctcaggtctgct      | Fragment 2 Amplicon         |
| Spfor441    | TCGTCGGCAGCGTCAGATGTGTATAAGAGACAGNNNNNNNNNg<br>aaactggtggactctaccgataa  | Fragment 3 Amplicon         |
| Sprev652    | GTCTCGTGGGCTCGGAGATGTGTATAAGAGACAGNNNNNNNNN<br>ggttctccagtctccgactc     | Fragment 3 Amplicon         |
| Spfor653    | TCGTCGGCAGCGTCAGATGTGTATAAGAGACAGNNNNNNNNNtg<br>agcgcccgctgtctaa        | Fragment 4 Amplicon         |
| Sprev865    | GTCTCGTGGGCTCGGAGATGTGTATAAGAGACAGNNNNNNNNN<br>gattcttagggccaggaac      | Fragment 4 Amplicon         |
| Spfor866    | TCGTCGGCAGCGTCAGATGTGTATAAGAGACAGNNNNNNNNNg<br>gcatcagtagcagacct        | Fragment 5 Amplicon         |
| Sprev1078   | GTCTCGTGGGCTCGGAGATGTGTATAAGAGACAGNNNNNNNNN<br>ccccgccgtcaatatatccg     | Fragment 5 Amplicon         |
| Spfor1079   | TCGTCGGCAGCGTCAGATGTGTATAAGAGACAGNNNNNNNNNtc<br>agagcaagaatgggtacgc     | Fragment 6 Amplicon         |
| Sprev1269   | GTCTCGTGGGCTCGGAGATGTGTATAAGAGACAGNNNNNNNNN<br>tgggtagaagtcttctctggc    | Fragment 6 Amplicon         |
| Spfor1270   | TCGTCGGCAGCGTCAGATGTGTATAAGAGACAGNNNNNNNNNct<br>gcacgccatcctgaggc       | Fragment 7 Amplicon         |
| Sprev1490   | GTCTCGTGGGCTCGGAGATGTGTATAAGAGACAGNNNNNNNNN<br>gtttggcaggttctgtcgaa     | Fragment 7 Amplicon         |
| Spfor1491   | TCGTCGGCAGCGTCAGATGTGTATAAGAGACAGNNNNNNNNNa<br>gtcttcattgagaggatgacaaac | Fragment 8 Amplicon         |
| Sprev1678   | GTCTCGTGGGCTCGGAGATGTGTATAAGAGACAGNNNNNNNNN<br>tcctcttcagctgcttgac      | Fragment 8 Amplicon         |
| Spfor1679   | TCGTCGGCAGCGTCAGATGTGTATAAGAGACAGNNNNNNNNNgt<br>ttaaaccatcgaaggtgac     | Fragment 9 Amplicon         |
| Sprev1895   | GTCTCGTGGGCTCGGAGATGTGTATAAGAGACAGNNNNNNNNN<br>cataagtcttcaggcgttctt    | Fragment 9 Amplicon         |
| Spfor1896   | TCGTCGGCAGCGTCAGATGTGTATAAGAGACAGNNNNNNNNNct<br>gtttgaggatagggaaatgatc  | Fragment 10 Amplicon        |
| Sprev2118   | GTCTCGTGGGCTCGGAGATGTGTATAAGAGACAGNNNNNNNNN<br>cacctgtgccttctggatat     | Fragment 10 Amplicon        |

|           |                                                                       |                      |
|-----------|-----------------------------------------------------------------------|----------------------|
| Spfor2119 | TCGTCGGCAGCGTCAGATGTGTATAAGAGACAGNNNNNNNNNc<br>agcctgaccttcaaagagg    | Fragment 11 Amplicon |
| Sprev2342 | GTCTCGTGGGCTCGGAGATGTGTATAAGAGACAGNNNNNNNNN<br>atcccttctcgtatgcgtt    | Fragment 11 Amplicon |
| Spfor2343 | TCGTCGGCAGCGTCAGATGTGTATAAGAGACAGNNNNNNNNNa<br>gaactcaagggagcgcgtg    | Fragment 12 Amplicon |
| Sprev2570 | GTCTCGTGGGCTCGGAGATGTGTATAAGAGACAGNNNNNNNNN<br>cggttttgtcagagcgggt    | Fragment 12 Amplicon |
| Spfor2571 | TCGTCGGCAGCGTCAGATGTGTATAAGAGACAGNNNNNNNNNc<br>agcattgacaataaggtgctg  | Fragment 13 Amplicon |
| Sprev2794 | GTCTCGTGGGCTCGGAGATGTGTATAAGAGACAGNNNNNNNNN<br>atcggttatccagaatctg    | Fragment 13 Amplicon |
| Spfor2795 | TCGTCGGCAGCGTCAGATGTGTATAAGAGACAGNNNNNNNNNa<br>gatcacaagcagcgtcgt     | Fragment 14 Amplicon |
| Sprev3020 | GTCTCGTGGGCTCGGAGATGTGTATAAGAGACAGNNNNNNNNN<br>ccttatagtcgacctacacgaa | Fragment 14 Amplicon |
| Spfor3021 | TCGTCGGCAGCGTCAGATGTGTATAAGAGACAGNNNNNNNNNa<br>ccctaaactggagagcgaa    | Fragment 15 Amplicon |
| Sprev3217 | GTCTCGTGGGCTCGGAGATGTGTATAAGAGACAGNNNNNNNNN<br>aaatctctccctttgtcccac  | Fragment 15 Amplicon |
| Spfor3218 | TCGTCGGCAGCGTCAGATGTGTATAAGAGACAGNNNNNNNNNg<br>cgagaccggggaaatcgt     | Fragment 16 Amplicon |
| Sprev3428 | GTCTCGTGGGCTCGGAGATGTGTATAAGAGACAGNNNNNNNNN<br>tccacctttgaccaccag     | Fragment 16 Amplicon |
| Spfor3429 | TCGTCGGCAGCGTCAGATGTGTATAAGAGACAGNNNNNNNNNc<br>caacagtggcttactctgtc   | Fragment 17 Amplicon |
| Sprev3632 | GTCTCGTGGGCTCGGAGATGTGTATAAGAGACAGNNNNNNNNN<br>ggcgcttgccagcatcct     | Fragment 17 Amplicon |
| Spfor3633 | TCGTCGGCAGCGTCAGATGTGTATAAGAGACAGNNNNNNNNNa<br>gctggaaaacggcagaaaag   | Fragment 18 Amplicon |
| Sprev3852 | GTCTCGTGGGCTCGGAGATGTGTATAAGAGACAGNNNNNNNNN<br>ggacaggaccttatccagattg | Fragment 18 Amplicon |
| Spfor3853 | TCGTCGGCAGCGTCAGATGTGTATAAGAGACAGNNNNNNNNNa<br>agagtgatcctggctgacg    | Fragment 19 Amplicon |
| Sprev4070 | GTCTCGTGGGCTCGGAGATGTGTATAAGAGACAGNNNNNNNNN<br>tgactcaggtcgattctggt   | Fragment 19 Amplicon |
| Spfor4071 | TCGTCGGCAGCGTCAGATGTGTATAAGAGACAGNNNNNNNNNa<br>gagtattactggactgtacgag | Fragment 20 Amplicon |
| Sprev4246 | GTCTCGTGGGCTCGGAGATGTGTATAAGAGACAGNNNNNNNNN<br>cgctacctgcatctgacga    | Fragment 20 Amplicon |

## Supplementary Table 2: Plasmids used in this study

| Plasmid Name            | Description                                     | Source                  |
|-------------------------|-------------------------------------------------|-------------------------|
| pUC-ProD-Cas9-T2        | Cas9 and T2 gRNA bacterial expression plasmid   | This work               |
| pUC-ProD-LacZ-T2        | Cloning plasmid used to generate mutant library | This work               |
| EF-SpCas9               | Cas9 mammalian expression plasmid               | Our lab                 |
| EF- RBS-SpCas9          | Template plasmid for ep-PCR                     | This work               |
| pCRII – U6 gRNA         | gRNA mammalian expression plasmid               | Our lab                 |
| pACYC184 -tacP-ccdB -T2 | Positive selection plasmid                      | This work               |
| pH3 – OT9               | Negative selection plasmid                      | This work               |
| pACYC184                | Parent vector of positive selection plasmid     | NEB                     |
| pH3U3-mcs               | Parent vector of negative selection plasmid     | Addgene plasmid # 12609 |



### Supplementary Table 3: Oligos used in this study

| Sense Name                 | Sense Oligo                                                                                                                   | Anti-Sense Name          | Anti-sense Oligo                                                                                                         |
|----------------------------|-------------------------------------------------------------------------------------------------------------------------------|--------------------------|--------------------------------------------------------------------------------------------------------------------------|
| <b>GFP Targeting gRNAs</b> |                                                                                                                               |                          |                                                                                                                          |
| Site1 (s)                  | ACCGGGCACGGGCAGCTTGCCGG                                                                                                       | Site1 (a)                | AAACCCGGCAAGCTGCCCGTGCC                                                                                                  |
| Site 4 (s)                 | ACCGGCGAGGGCGATGCCACCTA                                                                                                       | Site 4 (a)               | AAACTAGGTGGCATCGCCCTCGC                                                                                                  |
| Site 5 (s)                 | ACCGGTCGCCACCATGGTGAGCA                                                                                                       | Site 5 (a)               | AAACTGCTCACCATGGTGGCGAC                                                                                                  |
| Site 6 (s)                 | ACCGGTCAGGGTGGTCACGAGGG                                                                                                       | Site 6 (a)               | AAACCCCTCGTGACCACCCTGAC                                                                                                  |
| Site 7 (s)                 | ACCGGTGGTGCAGATGAACTTCA                                                                                                       | Site 7 (a)               | AAACTGAAGTTCATCTGCACCAC                                                                                                  |
| Site 8 (s)                 | ACCGTTGGGGTCTTTGCTCAGGG                                                                                                       | Site 8 (a)               | AAACCCCTGAGCAAAGACCCCAA                                                                                                  |
| Site 9 (s)                 | ACCGGTGGTACGAGGGTGGGCC                                                                                                        | Site 9 (a)               | AAACGGCCCACCCTCGTGACCAC                                                                                                  |
| Site 10 (s)                | ACCGATGCCGTTCTTCTGCTTGT                                                                                                       | Site 10 (a)              | AAACACAAGCAGAAGAACGGCAT                                                                                                  |
| Site 1 mm<br>12 (s)        | ACCGGGCACGGCCAGCTTGCCGG                                                                                                       | Site 1 mm<br>12 (a)      | AAACCCGGCAAGCTGGCCGTGCC                                                                                                  |
| Site 1 mm<br>19 & 18 (s)   | ACCGCCCACGGGCAGCTTGCCGG                                                                                                       | Site 1 mm<br>19 & 18 (a) | AAACCCGGCAAGCTGCCCGTGGG                                                                                                  |
| Site 7 mm<br>19 (s)        | ACCGCTGGTGCAGATGAACTTCA                                                                                                       | Site 7 mm<br>19 (a)      | AAACTGAAGTTCATCTGCACCAG                                                                                                  |
| Site 7 mm<br>18 (s)        | ACCGGAGGTGCAGATGAACTTCA                                                                                                       | Site 7 mm<br>18 (a)      | AAACTGAAGTTCATCTGCACCTC                                                                                                  |
| Site 7 mm<br>17 (s)        | ACCGGTCGTGCAGATGAACTTCA                                                                                                       | Site 7 mm<br>17 (a)      | AAACTGAAGTTCATCTGCACGAC                                                                                                  |
| Site 7 mm<br>16 (s)        | ACCGGTGCTGCAGATGAACTTCA                                                                                                       | Site 7 mm<br>16 (a)      | AAACTGAAGTTCATCTGCAGCAC                                                                                                  |
| Site 7 mm<br>15 (s)        | ACCGGTGGAGCAGATGAACTTCA                                                                                                       | Site 7 mm<br>15 (a)      | AAACTGAAGTTCATCTGCTCCAC                                                                                                  |
| Site 7 mm<br>14 (s)        | ACCGGTGGTCCAGATGAACTTCA                                                                                                       | Site 7 mm<br>14 (a)      | AAACTGAAGTTCATCTGGACCAC                                                                                                  |
| Site 7 mm<br>13 (s)        | ACCGGTGGTGGAGATGAACTTCA                                                                                                       | Site 7 mm<br>13 (a)      | AAACTGAAGTTCATCTCCACCAC                                                                                                  |
| Site 7 mm<br>12 (s)        | ACCGGTGGTGGTGCAGATGAACTTCA                                                                                                    | Site 7 mm<br>12 (a)      | AAACTGAAGTTCATCAGCACCAC                                                                                                  |
| Site 7 mm<br>11 (s)        | ACCGGTGGTGCACATGAACTTCA                                                                                                       | Site 7 mm<br>11 (a)      | AAACTGAAGTTCATGTGCACCAC                                                                                                  |
| Site 7 mm<br>10 (s)        | ACCGGTGGTGCAGTTGAACTTCA                                                                                                       | Site 7 mm<br>10 (a)      | AAACTGAAGTTCAACTGCACCAC                                                                                                  |
| <b>pH3 Targets</b>         |                                                                                                                               |                          |                                                                                                                          |
| 2x - OT9<br>(s)            | GAGCTCGCCCCACCCACCCCGCCT<br>CCGGAGCCCCACCCACCCCGCCT<br>CGG                                                                    | 2x - OT9 (a)             | CCGGCCGGAGGCGGGGTGGGTGGGGGCT<br>CCGGAGGCGGGGTGGGTGGGGGCGAGCT<br>CGACGT                                                   |
| <b>pACYC184 Targets</b>    |                                                                                                                               |                          |                                                                                                                          |
| 4x - T2 (s)                | TCGACGAATTCACCTAAGACCCCCTCC<br>ACCCCGCCTCCGGGACCCCCTCCAC<br>CCCGCCTCCGGGACCCCCTCCACCC<br>CGCCTCCGGGACCCCCTCCACCCCG<br>CCTCCGG | 4x -T2 (a)               | TCGACCGGAGGCGGGGTGGAGGGGGTCC<br>CGGAGGCGGGGTGGAGGGGGTCCCGGAG<br>GCGGGGTGGAGGGGGTCCCGGAGGCGGG<br>GTGGAGGGGGTCTTAGTGAATTCG |
| 1x - T2 (s)                | TCGGGAATTCGACCCCCTCCACCCCG<br>CCTCCGG                                                                                         | 1x - T2 (a)              | CCGACCGGAGGCGGGGTGGAGGGGGTCCG<br>AATTC                                                                                   |

## Supplementary Table 4

|                           | Stop Codon |     |     | Total |
|---------------------------|------------|-----|-----|-------|
|                           | TGA        | TAG | TAA |       |
| <b>Negative Selection</b> |            |     |     |       |
| Increased                 | 19         | 8   | 34  | 61    |
| Decreased                 | 1          | 11  | 0   | 12    |
| Total                     | 20         | 19  | 34  | 73    |
| <b>Positive Selection</b> |            |     |     |       |
| Increased                 | 12         | 3   | 3   | 18    |
| Decreased                 | 22         | 116 | 112 | 250   |
| Total                     | 34         | 119 | 115 | 268   |

**Supplementary Table 4: Stop codons with significantly altered frequencies following selection.** Nonsense mutations with significantly different frequencies after selection as determined by Fisher's exact test are separated by codon, selection, and direction of change.
